# Supplementary material for: Targeting de novo purine biosynthesis for tuberculosis treatment
Source: Research Square preprint supplement (doi:10.21203/rs.3.rs-4913610/v1), 2024-09-05
Supplement: Supplementary file 1 [file 837c3a75a0032e3741e450ad.docx]

SUPPLEMENTARY INFORMATION

**Targeting *de novo* purine biosynthesis for tuberculosis treatment**

Dirk A. Lamprecht1,*,#, Richard J. Wall2,#,Annelies Leemans1,#, Joke Sprangers1,3, Patricia Fiogbe1,3, Cadi Davies2, Jennefer Wetzel1, Stijn Daems1, William Pearson2, Samantha Saylock4, M. Daniel Ricketts4, Ellie Davis2, Adam Huff4, Tsehai Grell4, Shiming Lin5, Michelle Gerber5, Ann Vos6, Sam J. Willcocks2, John Dallow2,Christine Roubert6, Stéphanie Sans6, Amandine Desorme6, Nicolas Chappat6, Aurélie Ray6,Kathleen W. Clancy4, Pavankumar Sancheti7, Melissa Everaerts7, Mario Monshouwer1, Jorge Esquivias8, Gerald Larrouy-Maumus9, Ruxandra Draghia Akli4, Helen Fletcher2,10, Alexander S. Pym10, Bart Stoops7, Neeraj Dhar5, Paul Jackson11, Clara Aguilar-Pérez1 and Anil Koul1,2,*

#Contributed equally

1Janssen Global Public Health, LLC, Janssen Pharmaceutica NV, Turnhoutseweg 30, 2340 Beerse, Antwerpen, Belgium

2Department of Infection Biology, Faculty of Infectious and Tropical Disease, London School of Hygiene & Tropical Medicine, London, WC1E 7HT, UK

3Charles River Laboratories, Turnhoutseweg 30, 2340 Beerse, Belgium

4Janssen Research & Development, LLC, Janssen Pharmaceutica, 1400 McKean Road, Spring House, Pennsylvania 19477-0776, US

5Vaccine and Infectious Disease Organization, University of Saskatchewan, Saskatoon, Saskatchewan, S7N 5E3, Canada

6Evotec ID (LYON) SAS, 40 Avenue Tony Garnier, 69007 Lyon, France

7Janssen Research & Development, LLC, Janssen Pharmaceutica NV, Turnhoutseweg 30, 2340 Beerse, Antwerpen, Belgium

8Janssen Research & Development, LLC, Janssen Pharmaceutica, C. Río Jarama, 75, 45007 Toledo, Spain

9Centre for Bacterial Resistance Biology, Department of Life Sciences, Faculty of Natural Sciences, Imperial College London, London, SW7 2AZ, UK.

10Janssen Global Public Health, LLC, Janssen Pharmaceutica, 50-100 Holmers Farm Way, High Wycombe, HP12 4DP, UK

11Janssen Global Public Health, LLC, Janssen Pharmaceutica, La Jolla, California 92121, US

[Supplementary Figures 4](#_Toc175736486)

[Supplementary Figure S1: High-throughput screening results 4](#_Toc175736487)

[Supplementary Figure S2: Genetic diversity of PurF based on comparison with clinical isolates 5](#_Toc175736488)

[Supplementary Figure S3: JNJ-6640 binding pocket prediction 5](#_Toc175736490)

[Supplementary Figure S4: Measurement of stable isotope-labelled nitrogen atom incorporation in purine metabolites 6](#_Toc175736492)

[Supplementary Figure S5: Validation of purF CRISPRi-mediated knockdown strains 7](#_Toc175736493)

[Supplementary Figure S6: Impact of purF transcript knockdown on bedaquiline susceptibility 7](#_Toc175736494)

[Supplementary Figure S7: Rescue assay of JNJ-6640-treated *M. tuberculosis* supplemented with exogenous nucleobases 8](#_Toc175736495)

[Supplementary Figure S8: Codon optimised sequences of *Mt*PurF and *Hs*PPAT for enzymatic studies 10](#_Toc175736496)

[Supplementary Figure S9: *Mt*PurF and *Hs*PPAT enzymatic validation data 11](#_Toc175736497)

[Supplementary Figure S10: PurF and PPAT amino acid alignment 13](#_Toc175736498)

[Supplementary Figure S11: JNJ-6640 is active against intracellular *M. tuberculosis* 14](#_Toc175736499)

[Supplementary Figure S12: Additional validation of the dormancy model for the foamy macrophage assay 15](#_Toc175736500)

[Supplementary Figure S13: Pharmacokinetic (PK) studies with JNJ-6640 16](#_Toc175736501)

[Supplementary Figure S14: Schematic of acute animal studies 17](#_Toc175736502)

[Supplementary Figure S15: Time-kill kinetics *in vitro* providing proof-of-concept for combination treatment with JNJ-6640 17](#_Toc175736503)

[Supplementary Figure S16: NMR 13C spectra for JNJ-6627 and JNJ-6640. 18](#_Toc175736504)

[Supplementary Tables 19](#_Toc175736505)

[Supplementary Table S1: JNJ-6640 activity under different *in vitro* conditions 19](#_Toc175736506)

[Supplementary Table S2: JNJ-6640 profiled against drug sensitive and resistant clinical isolates 20](#_Toc175736507)

[Supplementary Table S3: Profiling of JNJ-6640, JNJ-6627 and JNJ-7310-resistant strains against clinical compounds 20](#_Toc175736508)

[Supplementary Table S4: IC50 values from *Mt*PurF and *Hs*PPAT enzymatic assays 22](#_Toc175736509)

[Supplementary Table S5: Cell proliferation assay data 23](#_Toc175736510)

[Supplementary Table S6: Nucleobase concentrations in uninfected mouse lung tissue 26](#_Toc175736511)

[Supplementary Table S7: Foamy macrophage IC50 ratios to determine bactericidality in hypoxic conditions 27](#_Toc175736512)

[Supplementary Table S8: ADME and toxicology profile for JNJ-6640 28](#_Toc175736513)

[Supplementary Table S9: Pharmacokinetic profiling of JNJ-6640 29](#_Toc175736514)

[Supplementary Table S10: Oligos used in this study 30](#_Toc175736515)

# Supplementary Figures


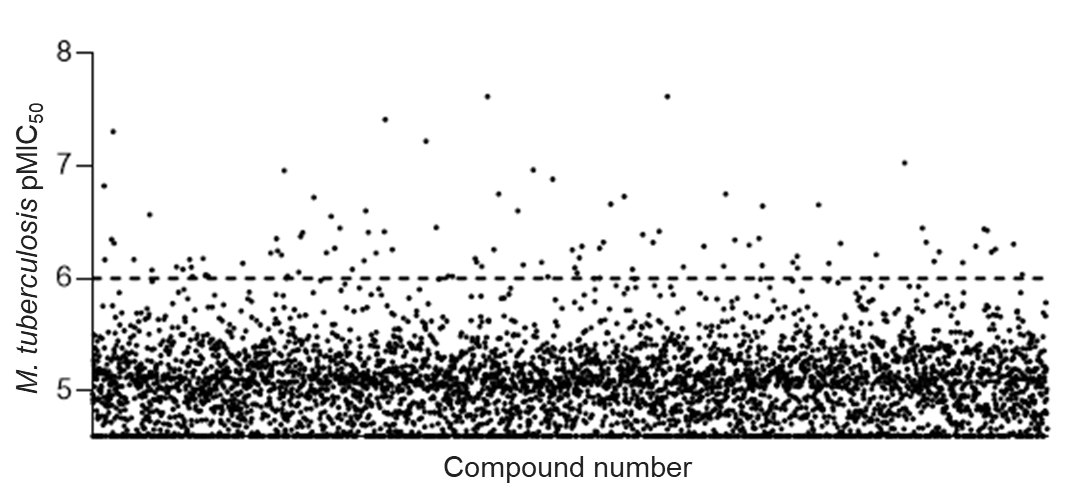


Supplementary Figure S1: High-throughput screening results – pMIC50 values for 4924 compounds against *M. tuberculosis*. A total of 102 compounds were active at ≤1 µM (pMIC50 = ≥6) resulting in a 2% hit rate.


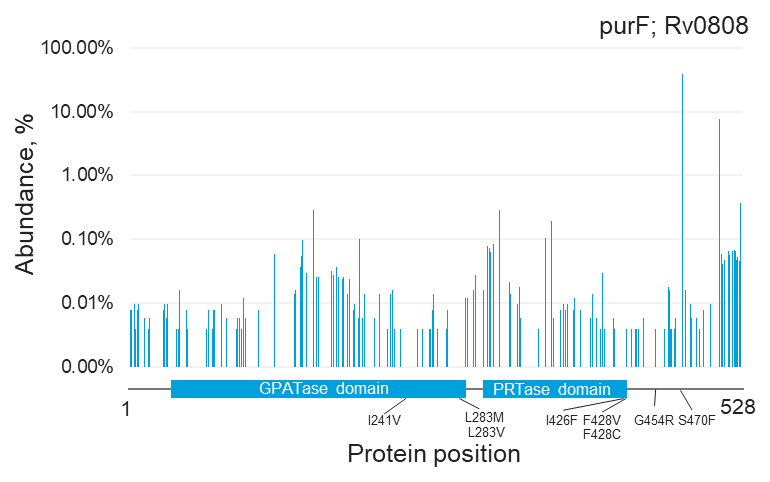


Supplementary Figure S2: Genetic diversity of PurF based on comparison with clinical isolates - Genetic variance in 51,183 clinical TB isolates. Protein domains predicted using InterPro domain search. Highlighted mutations identified from resistance generation experiments with PurF-targeting inhibitors. WGS of additional clones, not further profiled, also identified additional mutations in PurF.


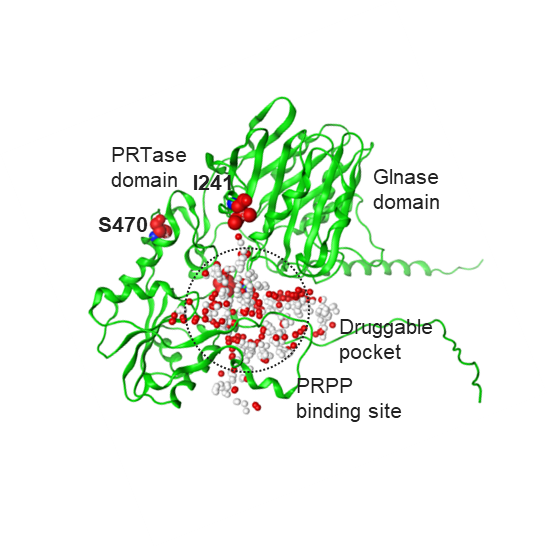


Supplementary Figure S3: JNJ-6640 binding pocket prediction – Prediction of the JNJ-6640 binding site within the PRPP binding site of PurF. PRTase domain: phosphoribosyl transferase domain.


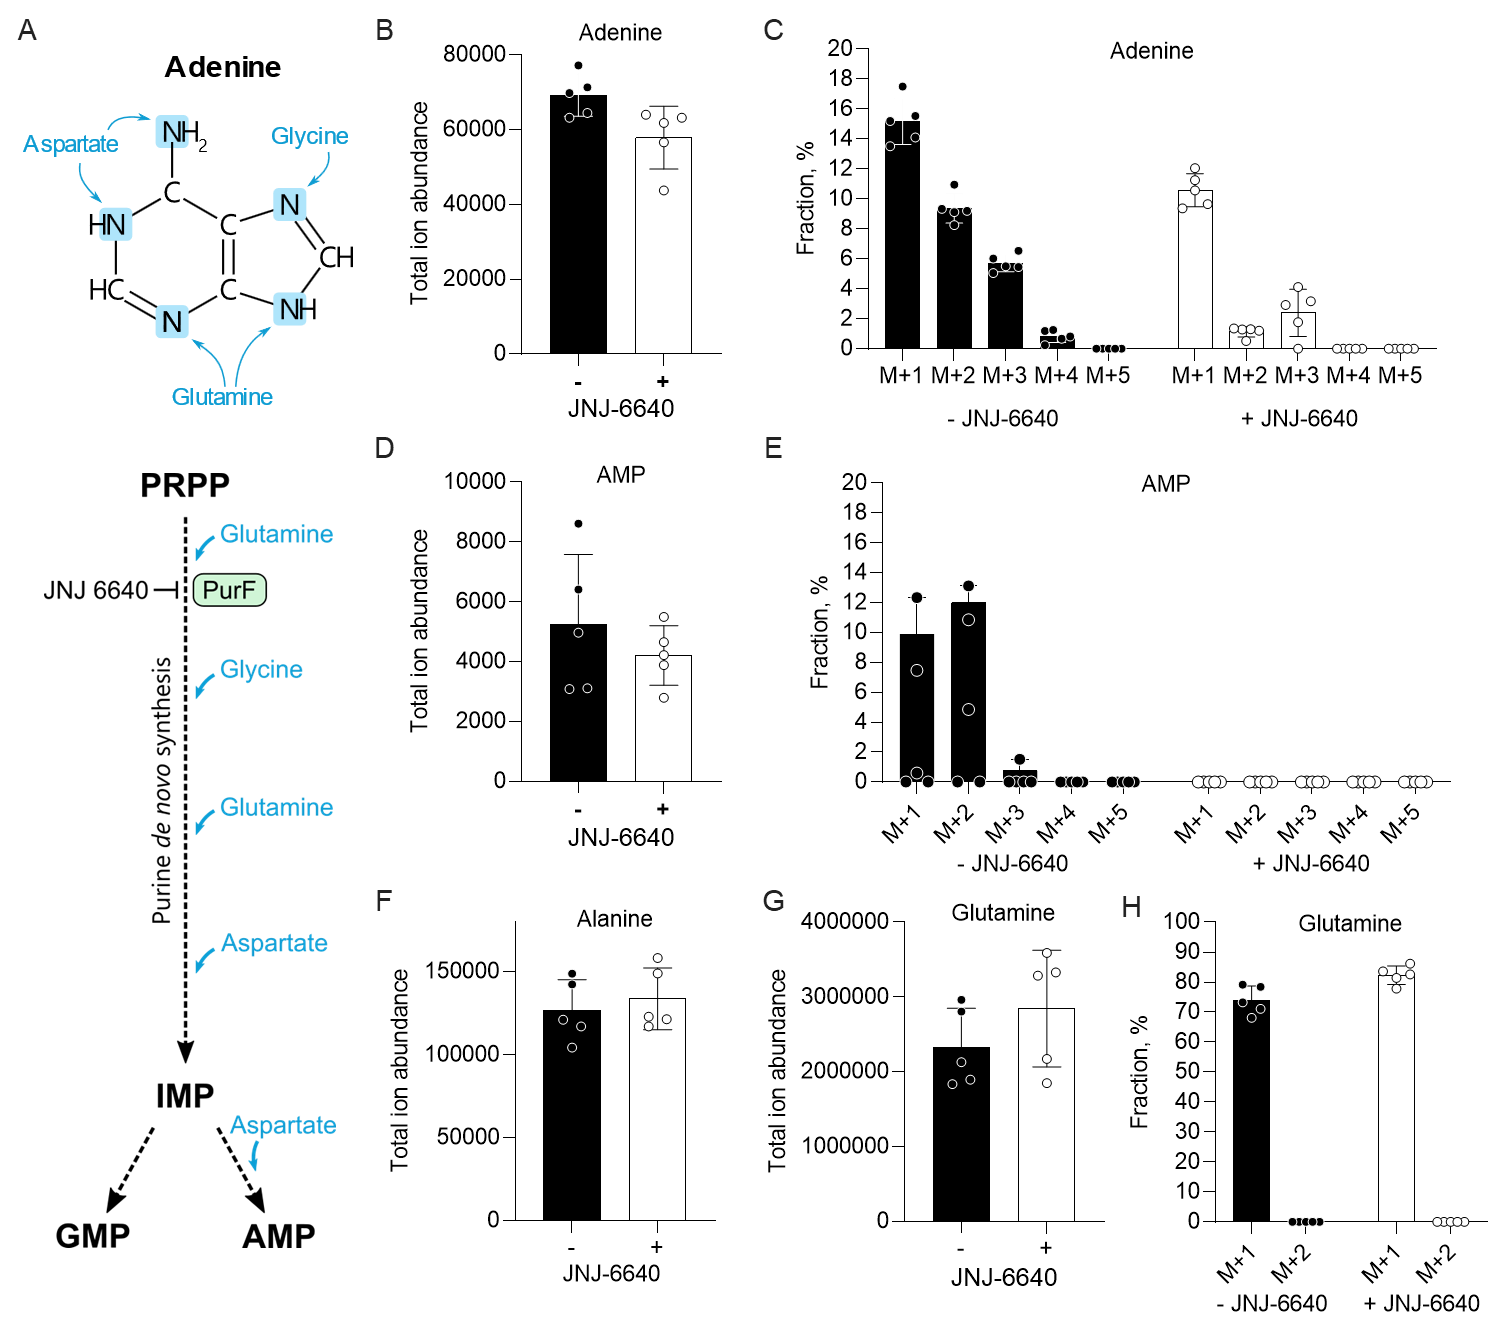


Supplementary Figure S4: Measurement of stable isotope-labelled nitrogen atom incorporation in purine metabolites - Stable isotope incorporation following co-treatment with 100 nM JNJ-6640 and 2 mM 15N- amide labelled glutamine for 4 hours showing inhibition of *de novo* purine biosynthesis. (A) Schematic of the structure of adenine and *de novo* purine biosynthetic pathway showing (in cyan) the amino acid donors of the purine nitrogen atoms. The total metabolite abundances, regardless of labelling, are shown for (B) adenine, (D) AMP, (F) alanine, and (G) glutamine. For the metabolites with multiple nitrogen atoms, the percentage of the total abundance made up by each labelled isotopologue are shown; (C) adenine, (E) AMP, and (H) glutamine. The different isotopologue species are indicated on the x-axes by M+(x), where x= the number of 15N atoms (after accounting for the natural abundance of 15N). In each graph, the remaining percent is made up of the unlabelled M+0 isotopologue species. n = 5 replicates ± SD. PRPP: Phosphoribosyl pyrophosphate; GMP: guanosine monophosphate; AMP: adenosine monophosphate.


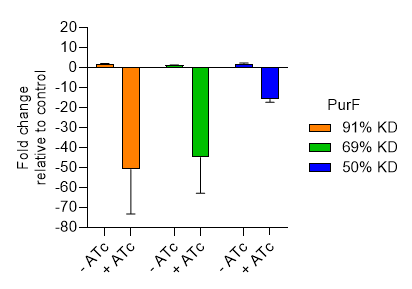


Supplementary Figure S5: Validation of purF CRISPRi-mediated knockdown strains – qRT-PCR demonstrating transcript knockdown (KD) for each strain (50%, 69% and 91% transcript reduction) ± induction with 100 ng mL-1 anhydrotetracycline (ATc). Individual sample Ct values were normalised against the reference gene, SigA (Rv2703), followed by normalisation against the transcript levels of a control strain containing the CRISPRi machinery without specific guide RNA.


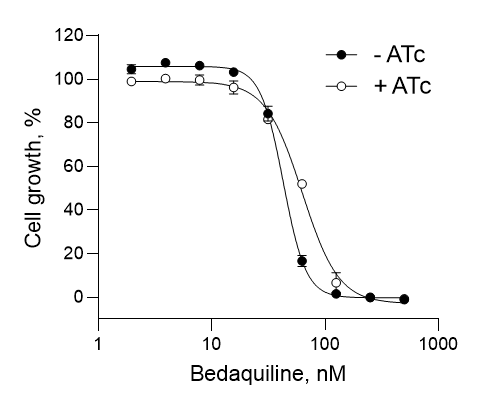


Supplementary Figure S6: Impact of purF transcript knockdown on bedaquiline susceptibility – Dose-response curves of bedaquiline in the presence (+ ATc; EC50 = 61 nM) and absence (- ATc; EC50 = 44 nM) of CRISPRi-mediated 50% transcript knockdown of PurF. n = 3 biological replicates ± SD. Representative of two independent experiments shown.

Supplementary Figure S7: Rescue assay of JNJ-6640-treated *M. tuberculosis* supplemented with exogenous nucleobases - Nucleobase rescue assay with 1 µM JNJ-6640 in the presence and absence of hypoxanthine and adenine. CFU count collected after 17 days treatment. n = 3 biological replicates ± SD

**> M.PurF.35-527.Ctag**  ATGTGCGGTGTGTTCGGTGTTTGGGCTCCAGGCGAAGACGTAGCGAAACTGACTTACTACGGTCTGTATGCACTGCAACACCGTGGTCAGGAAGCTGCTGGTATTGCGGTTGCGGATGGCAGCCAAGTTCTGGTGTTCAAAGACCTGGGTCTGGTTTCCCAGGTATTCGATGAACAAACTCTGGCTGCGATGCAAGGCCACGTGGCAATCGGTCATTGTCGCTATTCTACCACTGGTGACACTACTTGGGAGAACGCACAGCCAGTATTCCGCAACACCGCAGCTGGTACTGGTGTGGCTCTGGGTCATAACGGTAATCTGGTAAACGCTGCTGCACTGGCAGCACGTGCACGTGACGCTGGTCTGATTGCGACTCGCTGCCCAGCTCCAGCTACTACCGACAGCGACATCCTGGGTGCACTGCTGGCTCATGGTGCTGCTGATAGCACCCTGGAACAAGCTGCACTGGACCTGCTGCCGACCGTACGTGGTGCATTCTGCCTGACCTTCATGGATGAGAACACTCTGTACGCTTGCCGTGACCCGTACGGTGTTCGTCCACTGAGCCTGGGTCGTCTGGACCGTGGCTGGGTGGTAGCAAGCGAAACCGCTGCGCTGGACATCGTAGGTGCATCTTTCGTACGCGACATCGAGCCAGGCGAACTGCTGGCCATTGATGCGGATGGTGTTCGTTCCACCCGTTTCGCTAACCCAACTCCGAAAGGTTGTGTGTTTGAATACGTGTATCTGGCTCGTCCGGATTCTACTATTGCTGGTCGTTCCGTACATGCAGCACGTGTTGAAATCGGTCGTCGTCTGGCACGTGAATGTCCAGTTGAAGCGGACCTGGTGATCGGTGTTCCGGAAAGCGGTACTCCAGCAGCGGTTGGTTACGCACAGGAATCCGGTGTTCCGTACGGTCAAGGTCTGATGAAGAACGCCTACGTGGGTCGCACCTTCATTCAACCGTCTCAGACTATCCGTCAGCTGGGTATTCGTCTGAAACTGAACCCACTGAAGGAAGTTATCCGTGGTAAGCGTCTGATTGTTGTTGACGATTCCATTGTGCGTGGCAATACCCAACGTGCTCTGGTTCGTATGCTGCGTGAGGCTGGTGCCGTGGAACTGCACGTTCGTATCGCCTCTCCGCCGGTAAAGTGGCCATGCTTCTATGGCATCGACTTCCCGTCTCCAGCAGAGCTGATCGCAAACGCAGTGGAGAACGAAGACGAAATGCTGGAAGCCGTTCGTCACGCTATCGGTGCGGATACCCTGGGTTACATCAGCCTGCGTGGTATGGTGGCTGCGTCTGAACAGCCGACCAGCCGTCTGTGCACTGCGTGCTTCGACGGCAAGTACCCGATTGAACTGCCACGTGAAACCGCACTGGGCAAGAACGTTATCGAGCACATGCTGGCTAACGCTGCTCGTGGTGCAGCTCTGGGTGAACTGGCTGCCGATGACGAAGTTCCGGTTGGTCGTGAACCAGAAGCCTGATAA

**>PPAT.1-517.CSrtA.FLAG.His8** ATGGAACTGGAAGAGCTGGGTATCAGAGAAGAATGTGGTGTGTTTGGTTGCATTGCATCTGGCGAGTGGCCAACCCAACTGGATGTCCCTCACGTGATTACCCTGGGTCTGGTTGGTCTGCAACATAGAGGACAAGAATCCGCAGGCATTGTTACAAGCGATGGCAGCTCCGTGCCTACCTTCAAGAGCCACAAAGGAATGGGACTCGTTAACCACGTGTTTACTGAGGACAATCTGAAGAAGCTGTACGTCTCTAACCTGGGTATTGGTCACACCAGATACGCCACTACTGGTAAGTGCGAACTGGAGAACTGTCAGCCCTTTGTCGTCGAGACACTGCATGGCAAGATTGCTGTGGCTCACAACGGAGAACTGGTGAACGCAGCTAGGCTGCGCAAGAAGCTGCTGAGGCACGGTATCGGTCTGTCCACCTCCTCTGATTCTGAGATGATCACTCAGCTCCTCGCATACACACCTCCACAGGAGCAGGATGATACTCCAGACTGGGTTGCCAGAATCAAGAACCTGATGAAAGAGGCACCTACTGCCTACTCCCTGCTGATCATGCACAGAGACGTGATCTATGCCGTCAGAGATCCTTACGGCAATAGACCACTCTGCATCGGCAGGCTGATTCCCGTCTCCGACATCAACGACAAAGAGAAGAAGACCTCCGAAACCGAGGGCTGGGTCGTGTCCTCCGAATCCTGTAGCTTCCTCTCTATCGGAGCAAGATACTACAGGGAGGTGCTCCCTGGAGAAATCGTTGAGATCAGCAGACACAATGTTCAAACCCTGGACATCATCTCCAGAAGCGAAGGCAATCCAGTCGCCTTCTGTATCTTTGAGTATGTGTACTTCGCTAGACCCGACTCTATGTTTGAAGACCAAATGGTGTACACCGTGAGGTATCGCTGTGGTCAGCAACTCGCTATTGAGGCTCCCGTTGACGCAGACCTCGTCAGCACCGTGCCTGAGTCTGCCACACCAGCAGCTCTGGCTTATGCAGGCAAGTGTGGACTCCCATACGTCGAAGTGCTGTGTAAGAACAGATACGTGGGTAGAACATTCATCCAGCCTAACATGAGGCTGAGACAGCTCGGAGTGGCTAAGAAGTTCGGAGTGCTGTCCGACAACTTCAAGGGCAAGAGGATCGTGCTCGTTGACGATAGCATCGTGAGAGGTAACACAATCAGCCCTATCATCAAACTGCTGAAGGAGTCTGGAGCAAAGGAAGTCCATATCAGGGTGGCAAGCCCTCCCATCAAGTACCCTTGCTTCATGGGCATCAACATCCCTACCAAGGAAGAGCTGATCGCCAACAAACCCGAGTTTGACCACCTCGCTGAATACCTGGGAGCCAACAGCGTCGTCTACCTCAGCGTGGAAGGACTCGTTTCCTCTGTTCAGGAGGGCATCAAGTTCAAGAAGCAGAAAGAGAAGAAACACGACATCATGATCCAGGAGAACGGAAATGGACTGGAGTGCTTTGAGAAGTCCGGTCACTGCACTGCCTGCCTGACAGGCAAGTACCCTGTCGAGCTGGAGTGGGGATCCGGTTCTGGTAGCCTGCCAGAAACTGGTGGTGACTACAAAGACGATGATGACAAACATCACCACCACCATCATCACCACTGATAA

## Supplementary Figure S8: Codon optimised sequences of *Mt*PurF and *Hs*PPAT for enzymatic studies


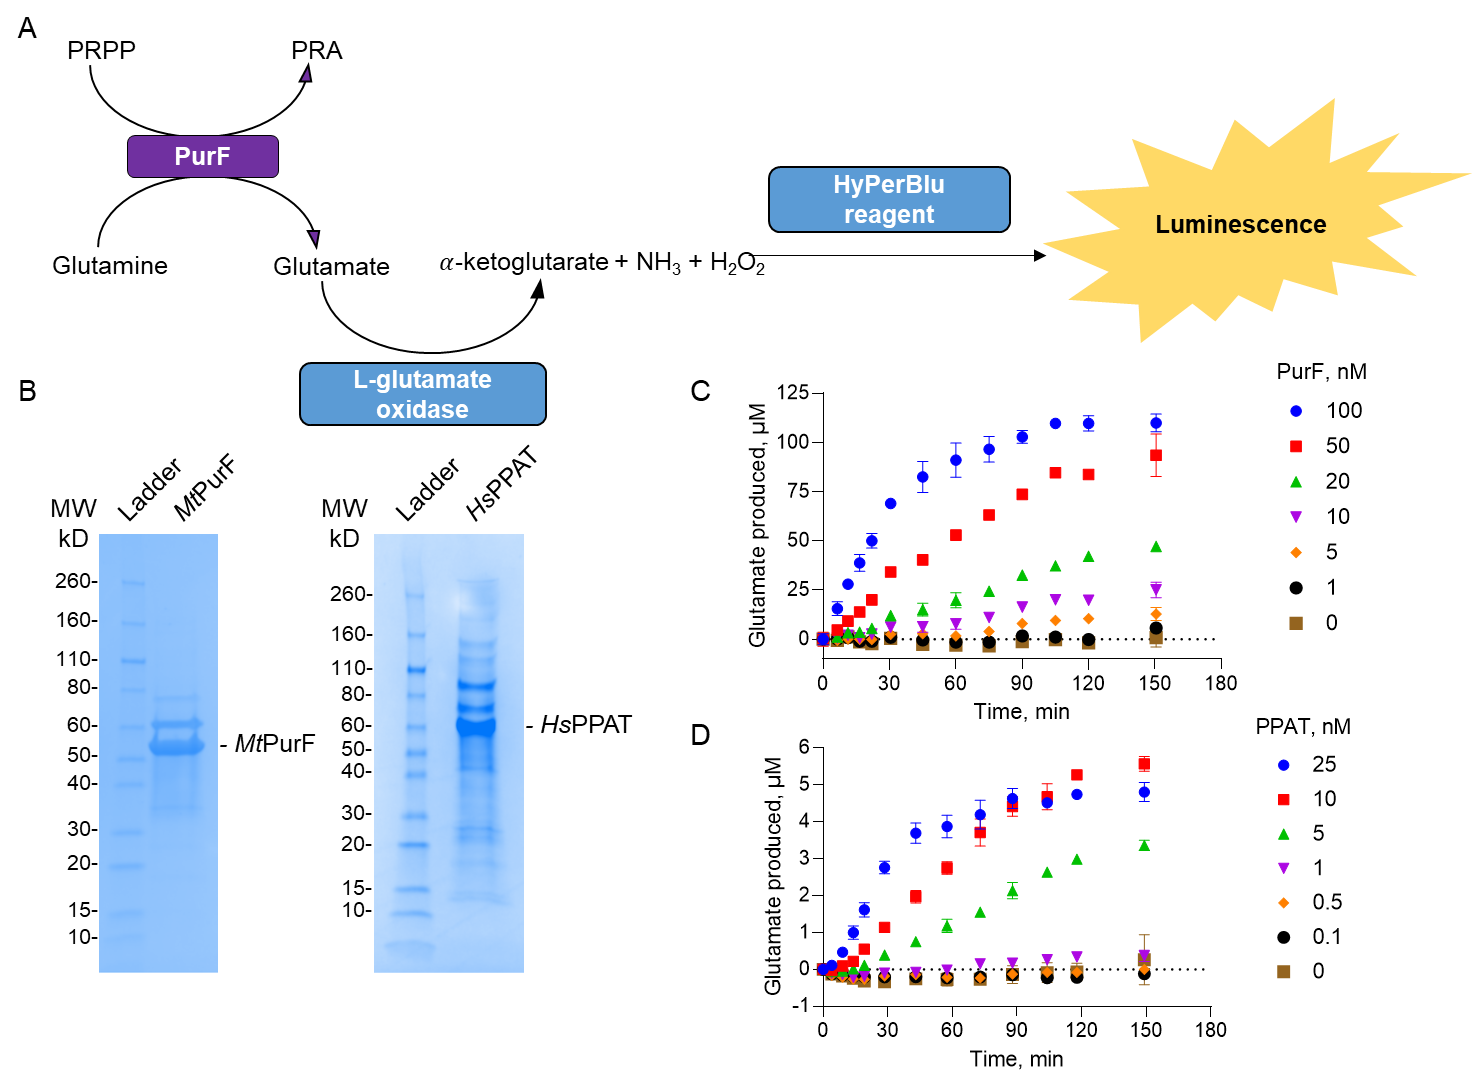


Supplementary Figure S9: *Mt*PurF and *Hs*PPAT enzymatic validation data - (A) Schematic for enzymatic assays. (B) SDS-PAGE gels showing *Mt*PurF and *Hs*PPAT protein purification. (C) PurF reaction progress curves in HyPerBlu assay with 70 mM glutamine and 300 µM PRPP. (D) PPAT reaction progress curves in HyPerBlu assay with 200 µM glutamine and 30 µM PRPP.

*M. tuberculosis* MAVDSDYVTDRAAGSRQTVTGQQPEQDLNSPREECGVFGVWAPGED-----VAKLTYYGL

*M. marinum* ------------------VTAQQSEEDFNAPREECGVFGVWAPGED-----VAKLSYYGL

*M. smegmatis* ------------------MIGHDDNESENEPREECGVFGVWAPGEE-----VAKLTYYGL

*M. abscessus* -------------------MTAQPIELENDPREECGVFGVWAPGEE-----VAKLTYYGL

*M. aeruginosa* --------------MSSHPDSSVSFASVDKPEEACGVFGLYAPEEE-----VAKLTYFGL

*S. pneumoniae* -----------------------MTYEVKSLNEECGVFGIWGHPDA------AKLTYFGL

*E. coli* ---------------------------------MCGIVGIAGVMPVN------QSIYDAL

*M. musculus* -----------------------MELEELGIREECGVFGCIASGDWPTQLDVPHVITLGL

*H. sapiens* -----------------------MELEELGIREECGVFGCIASGEWPTQLDVPHVITLGL

**:.* . : .*

*M. tuberculosis* YALQHRGQEAAGIAVADGSQVLVFK---DLGLVSQVFDEQTLAAMQG-HVAIGHCRYSTT

*M. marinum* YALQHRGQEAAGIAVADGSQVLVFK---DLGLVSQVFDEQTLAAMQG-HVAIGHCRYSTT

*M. smegmatis* YALQHRGQEAAGIAVADGSQVLVFK---DLGLVSQVFDEQTLAAMPG-HVAVGHCRYSTT

*M. abscessus* YALQHRGQEAAGIAVADGSQIVVFK---DLGLVSQVFDEQTLAAMRG-HVAVGHCRYSTT

*M. aeruginosa* YALQHRGQESAGIATYDGKTVHCYK---EMGLVSQVFNETVLKTLPG-THAVGHTRYSTT

*S. pneumoniae* HSLQHRGQEGAGILSNDQGQLKRHR---DMGLLSEVFRNPANLDKLTGAGAIGHVRYATA

*E. coli* TVLQHRGQDAAGIITIDANNCFRLR--KANGLVSDVFEARHMQRLQG-NMGIGHVRYPTA

*M. musculus*  VGLQHRGQESAGIVTSDGSAVPKFRVHKGMGLVNHVFTEDNLKKLYDSNLGIGHTRYATT

*H. sapiens* VGLQHRGQESAGIVTSDGSSVPTFKSHKGMGLVNHVFTEDNLKKLYVSNLGIGHTRYATT

******:.*** * : **:..** .:** **.*:

*M. tuberculosis* GDTTWENAQPVFRNTAAGTGVALGHNGNLVNAAALAARARDAGLIATRCPAPATTDSDIL

*M. marinum* GDTTWENAQPVFRNTAAGTGVALGHNGNLVNAAALAARARDEGLIGNRSSAPATTDSDIL

*M. smegmatis* GSTTWENAQPVFRNTAAGTGVALGHNGNLVNTAELAARARDNGLIELKGGPAATTDSDIL

*M. abscessus* GSVTWENAQPVFRTTAAGTGVALGHNGNLVNTAELTERARDAGLINSKTPGMATTDSDIM

*M. aeruginosa* GSSRRANAQPAVIESRLG-KLSLAHNGNLVNTFELRNVLEKRGCDFG----STTDSEMIA

*S. pneumoniae* GEASVDNIQPFLFR-FHDMQFGLAHNGNLTNAASLKKELEQRGAIFSATSDSEILAHLIR

*E. coli* GSSSASEAQPFYVNSPYG--ITLAHNGNLTNAHELRKKLFEEKRRHINTTSDSEILLNIF

*M. musculus* GKCELENCQPFVVETLHG-KIAVAHNGELVNAARLRKKLLRQGIGLSTSSDSEMITQLLA

*H. sapiens* GKCELENCQPFVVETLHG-KIAVAHNGELVNAARLRKKLLRHGIGLSTSSDSEMITQLLA

*. : ** . . :.***:*.*: * :

*M. tuberculosis* GALLAHGAADSTLEQAALDLLPTVR-----GAFCLTFMDENTLYACRDPYGVRPLSLGRL

*M. marinum* GALLAHGAADSSLEQAALELLPTVR-----GAFCLTFMDENTLYACRDPHGVRPLSLGRL

*M. smegmatis* GALLAHGAADATLEQAALELLPTVR-----GAFCLTFMDENTLYAARDPHGVRPLSLGRL

*M. abscessus* GALLAHGAADATLEQAAMTLLPTVR-----GAFCLVFADENTLYAARDPHGVRPLCLGRL

*M. aeruginosa* VAIGQEVDSGKDWIQAAIDAFSYCS-----GAYSLVIGTPTGIIGARDPNGVRPLVIGVL

*S. pneumoniae* RS------HNPSLMGKIKEALSLVK-----GGFAYILLFEDKLIAALDPNGFRPLSIGKM

*E. coli* ASELDNFRHYPLEADNIFAAIAATNRLIRGAYACVAMIIGHGMVAFRDPNGIRPLVLGKR

*M. musculus* YTPPQEKDDAPDWVARIKNLMKEAP-----AAYSLVIMHRDFIYAVRDPYGNRPLCIGRL

*H. sapiens* YTPPQEQDDTPDWVARIKNLMKEAP-----TAYSLLIMHRDVIYAVRDPYGNRPLCIGRL

: : . : : . ** * *** :*

*M. tuberculosis* DRG---------------WVVASETAALDIVGASFVRDIEPGELLAIDADGVRST-----

*M. marinum* DRG---------------WVVASETAALDIVGASFVRDIEPGELLAIDADGVRST-----

*M. smegmatis* DRG---------------WVVASETAALDIVGASFVRDIEPGELLAIDADGVRST-----

*M. abscessus* DTG---------------WVVASETAALDIVGASFVRDIEPGELLAIDADGVRSS-----

*M. aeruginosa* QEEGNP----------PRYVLASETCGLDIIGADYLRDVQPGELVWISEDGLSSV-----

*S. pneumoniae* ANG--------------AVVVSSETCAFEVIGAEWIRDLKPGEIVIIDDEGIQYD-----

*E. coli* DIDENR----------TEYMVASESVALDTLGFDFLRDVAPGEAIYITEEGQLFTRQCAD

*M. musculus*  MPVSDVNDKEKKSSETEGWVVSSESCSFLSIGARYCHEVKPGEIVEISRHGIRTL-----

*H. sapiens* IPVSDINDKEKKTSETEGWVVSSESCSFLSIGARYYREVLPGEIVEISRHNVQTL-----

:::**: .: :* : *:: *** : * ..

*M. tuberculosis* RFAN----PTPKGCVFEYVYLARPDSTIAGRSVHAARVEIGRRLARECP-----VEADLV

*M. marinum* RFAN----PTPKGCVFEYVYLARPDSMLNGRSVHAARVAIGRRLAQERR-----VEADLV

*M. smegmatis* RFAN----PEPKGCVFEYVYLARPDSTLVGRSVHATRVDIGRRLAREHP-----VEADLV

*M. abscessus* RFAN----ATPKTCVFEYVYLARPDSMLDGRSVHSTRVEIGRRLAAEHS-----VDADLV

*M. aeruginosa* DWAMK---PEKKLCVFEMIYFARPDSIVHEESLYTYRVRLGEQLAKESP-----VEADMV

*S. pneumoniae* SYTDD---TQLAVCSMEYIYFARPDSNIHGVNVHTARKRMGAQLAREFK-----HEADIV

*E. coli* N-------PVSNPCLFEYVYFARPDSFIDKISVYSARVNMGTKLGEKIAREWEDLDIDVV

*M. musculus* DIIPRSNGDPVAFCIFEYVYFARPDSMFEDQMVYTVRYRCGQQLAIEAP-----VEADLV

*H. sapiens* DIISRSEGNPVAFCIFEYVYFARPDSMFEDQMVYTVRYRCGQQLAIEAP-----VDADLV

* :* :*:***** . ::: * * :*. : : *:*

*M. tuberculosis* IGVPESGTPAAVGYAQESGVPYGQGLMKNAYVGRTFIQPSQTIRQLGIRLKLNPLKEVIR

*M. marinum* IGVPESGTPAAVGYAQESGIPYGQGLMKNAYVGRTFIQPSQTIRQLGIRLKLNPLKEVIR

*M. smegmatis* IGVPESGTPAAVGYAQESGIPFGQGLMKNAYVGRTFIQPSQTIRQLGIRLKLNPLREVIR

*M. abscessus* IGVPESGTPAAVGYAQGSGIPYGQGLMKNAYVGRTFIQPSQTIRQLGIRLKLNPLREVIR

*M. aeruginosa* MGVPDSGIPAAIGFSRISDIPYAEGLIKNRYVGRTFIQPTQHMRESGIKMKLNPLKDVLQ

*S. pneumoniae* VGVPNSSLSAAMGFAEESGLPNEMGLIKNQYTQRTFIQPTQELREQGVRMKLSAVSGVVK

*E. coli* IPIPETSCDIALEIARILGKPYRQGFVKNRYVGRTFIMPGQQLRRKSVRRKLNANRAEFR

*M. musculus* STVPESATPAALGYATKCGLPYVEVLCKNRYVGRTFIQPNMRLRQLGVAKKFGVLSDNFK

*H. sapiens* STVPESATPAALAYAGKCGLPYVEVLCKNRYVGRTFIQPNMRLRQLGVAKKFGVLSDNFK

:*::. *: : . * : ** *. **** * :*. .: *:. .:

*M. tuberculosis* GKRLIVVDDSIVRGNTQRALVRMLREAGAVELHVRIASPPVKWPCFYGIDFPSPAELIAN

*M. marinum* GKRLIVVDDSIVRGNTQRALVRMLREAGAVEVHVRIASPPVKWPCFYGIDFPSPAELIAN

*M. smegmatis* GKRLIVVDDSIVRGNTQRALVRMLREAGALEVHVRIASPPVRWPCFYGIDFATPAELIAN

*M. abscessus* GKRLVVVDDSIVRGNTQRALVRMLREAGAAEVHVRIASPPVRWPCFYGIDFASPAELIAN

*M. aeruginosa* GKRVIIVDDSIVRGTTSRKLVKALRDAGAREVHMRISSPPVTHPCFYGIDTDNQEQLIAA

*S. pneumoniae* GKRVVMVDDSIVRGTTSRRIVQLLKEAGATEVHVAIGSPALAYPCFYGIDIQTRQELIAA

*E. coli* DKNVLLVDDSIVRGTTSEQIIEMAREAGAKKVYLASAAPEIRFPNVYGIDMPSATELIAH

*M. musculus* GKRIVLIDDSIVRGNTISPIIKLLKESGAKEVHIRVASPPIKYPCFMGINIPTKEELIAN

*H. sapiens* GKRIVLVDDSIVRGNTISPIIKLLKESGAKEVHIRVASPPIKYPCFMGINIPTKEELIAN

.*.:::********.* ::. :::** :::: .:* : * . **: . :***

*M. tuberculosis* AVENEDE--MLEAVRHAIGADTLGYISLRGMVAAS----EQPTSRLCTACFDGKYPIELP

*M. marinum* AVEDENE--MLEAVRHVINADTLGYISLRGLVAAT----EQPISRLCTACFDGKYPIELP

*M. smegmatis* AASQEHEGEMLEAVRHAIGADSLGYISQQGMIAAT----EQPASRLCSACFDGKYPIELP

*M. abscessus* AVESDDE--MLDAVRTAIGADSLGYISAEGMVAAT----QEPRSRLCCACFDGNYPIELP

*M. aeruginosa* TKS-------VAQIQAQIGVDSLAYLSHDGMLTAT----KEDPKTFCTACFNGDYPIPVP

*S. pneumoniae* NHT-------VEETRQIIGADSLTYLSIDSLIESIGIETDAPNGGLCVAYFDGDYPTPLY

*E. coli* GRE-------VDEIRQIIGADGLVFQDLNDLIEAVRAE-NPDIQQFECSVFNGVYVTKDV

*M. musculus*  KPE-------FDCLAEYLGANSVVYLSVEGLVSSV----QQEIKFKKQKVKKHDIAIQEN

*H. sapiens* KPE-------FDHLAEYLGANSVVYLSVEGLVSSV----QEGIKFKKQKEKKHDIMIQEN

. :..: : : . .:: : . .

*M. tuberculosis* RETALGKNVIEHMLANAARGAALGELAADDEVPVGR

*M. marinum* GETALGKNVIEHMLANAARGAELGDVATDEVPIGH-

*M. smegmatis* GETALGKNVIEHMLASAARSGIPVAQNDNASALRRP

*M. abscessus* KETALGKNVVEHMLAATARETSSESSESVQAR----

*M. aeruginosa* DNVKRSKLILETVK----------------------

*S. pneumoniae* DYEEDYRRSLEEKTSFYK------------------

*E. coli* DQGYLDFLDTLRNDDAKAVQRQNEVENLEMHNEG--

*M. musculus*  GNGLEYFEKTGHCTACLTGQYPVELEW---------

*H. sapiens* GNGLECFEKSGHCTACLTGKYPVELEW---------

Supplementary Figure S10: PurF and PPAT amino acid alignment - *M. tuberculosis* H37Rv PurF, *Mycobacterium marinum* (MMAR_4881), *Mycobacterium smegmatis* MC2-155 (MSMEG_5800), *Mycobacterium abscessus* ATCC_19977 (MAB_0713), *Microcystis aeruginosa* (WP_316577043.1), *Streptococcus pneumoniae* (VTY32635.1), *Escherichia coli* (WP_160453027.1), *Mus musculus* (NP_742158.1) and *Homo sapiens* PPAT (NP_002694.3) amino acid alignment. Alignment performed using ClustalW. The *M. tuberculosis* predicted GPATase (grey) and PRTase (cyan) domains, as well as the locations of resistance-conferring residues (green/yellow), are highlighted.


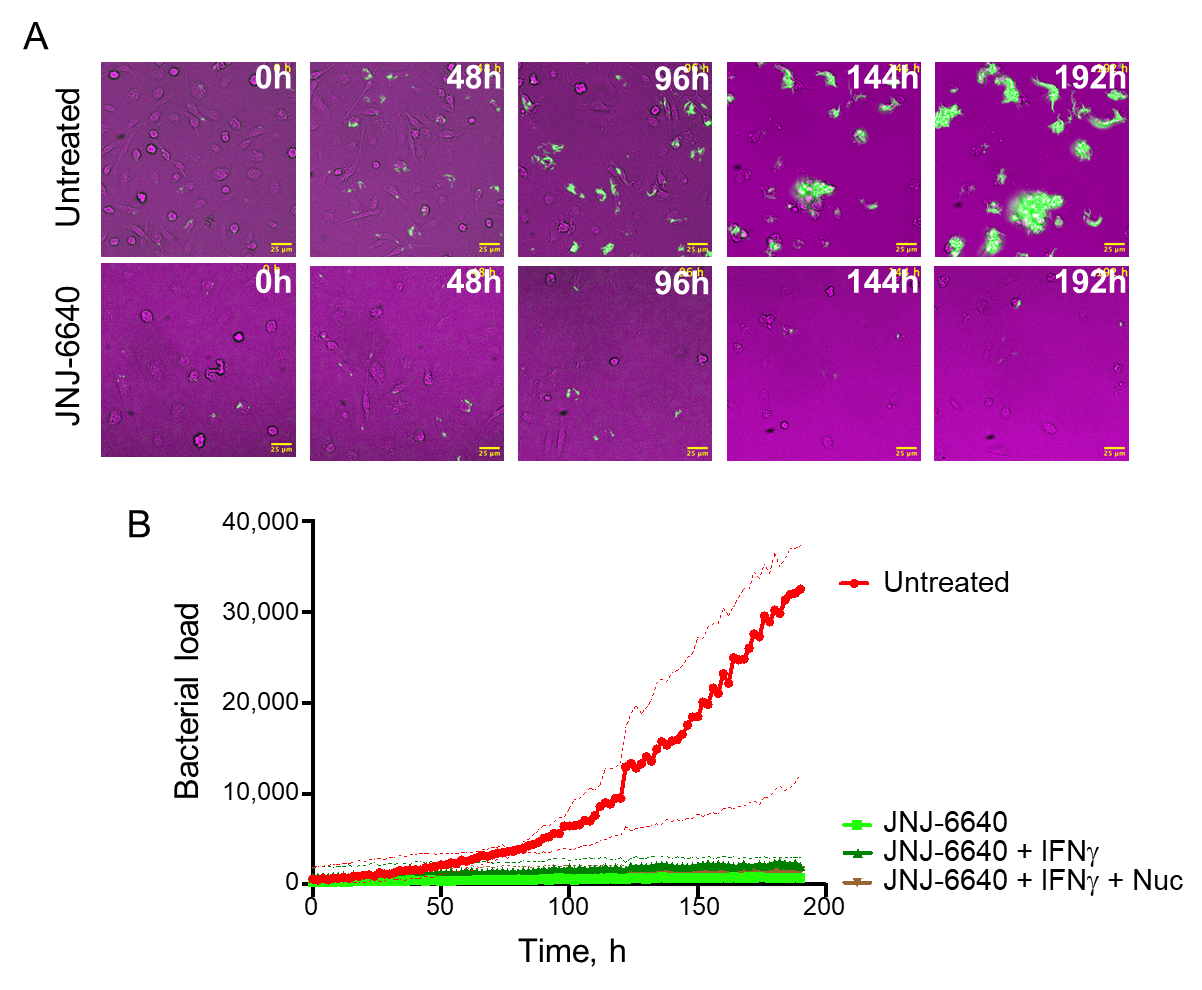


Supplementary Figure S11: JNJ-6640 is active against intracellular *M. tuberculosis* - Mouse bone marrow-derived macrophages were infected with *M. tuberculosis* expressing TdTomato and imaged by timelapse microscopy at 2 hours intervals for 190 hours. (A) Representative time series snapshots showing macrophages infected with fluorescent bacteria (green) over time, untreated (upper panels); treated with 3 µM JNJ-6640. Numbers on top right indicate hours elapsed. Scale bar represents 25 mm. (B) Plot depicting the bacterial load in infected macrophages over time under the different treatment conditions: no treatment; 3 µM JNJ-6640; 3 µM JNJ-6640 plus 100 ng mL-1 IFNg; 3 µM JNJ-6640 plus 100 ng mL-1 IFNg plus 1x nucleobases mix (Nuc). Bacterial load was determined from the fluorescence area in each time frame. Symbols represent median and error bars are interquartile range. n = 11 independent xy fields for each condition. Representative dataset from two independent experiments shown.


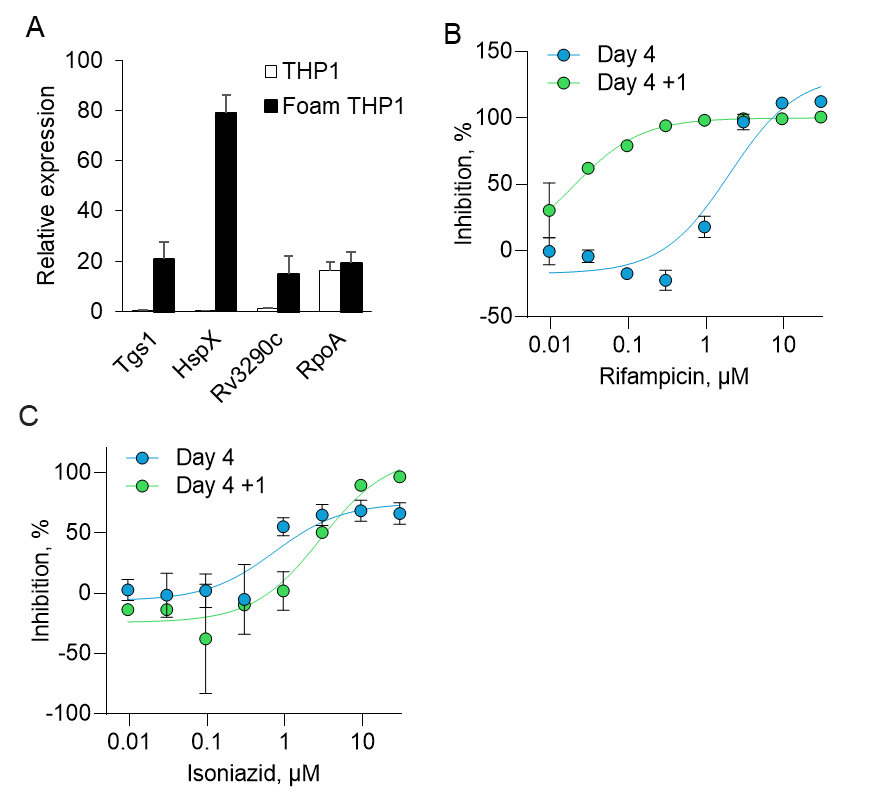


Supplementary Figure S12: Additional validation of the dormancy model for the foamy macrophage assay - (A) Relative expression of known dormancy genes Tgs1, HspX and Rv3290c in macrophages grown in dormancy conditions (Foam THP-1) compared to normoxic conditions (THP-1). No difference in the expression of the control gene, RpoA (Rv3457c), was observed. Relative expression compared to 16S-RSS shown. n = 3 biological replicates ± SD. Dose-response curves of control compounds (B) rifampicin (bactericidal) and (C) isoniazid (bacteriostatic) in a foamy macrophage assay. n = 2 individual experiments with 4 technical replicates ± SD.


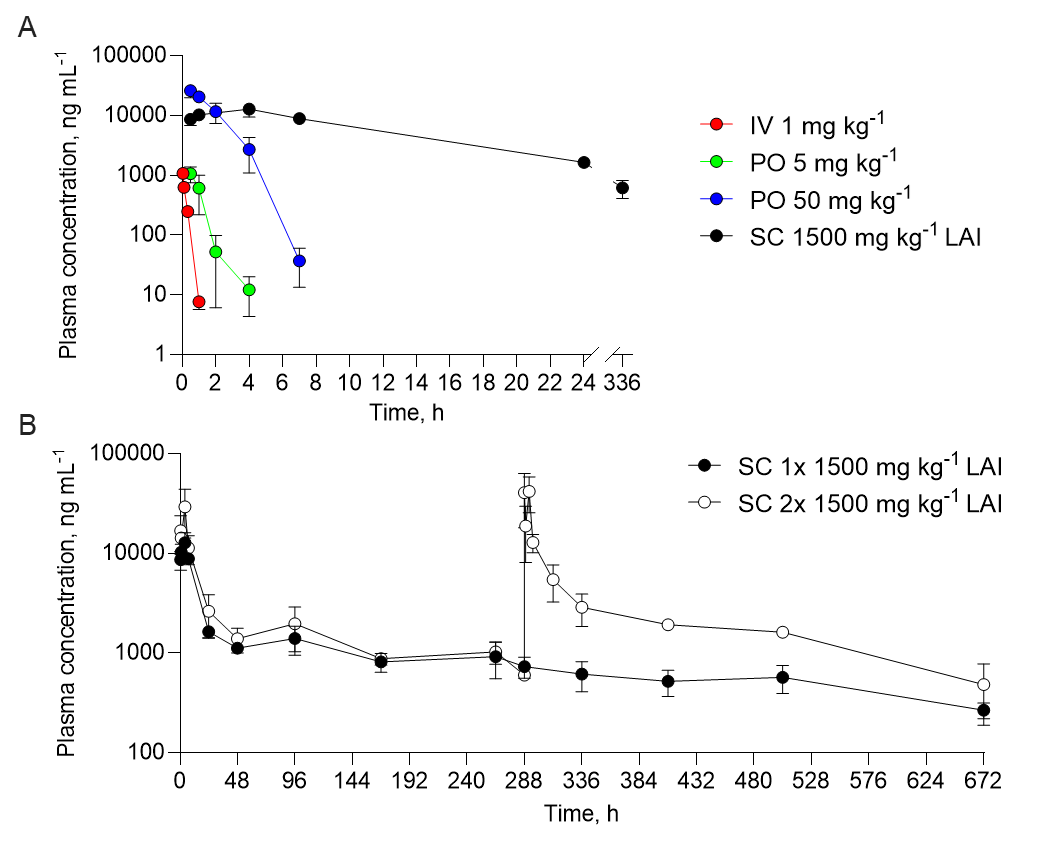


Supplementary Figure S13: Pharmacokinetic (PK) studies with JNJ-6640 - (A) Comparison of PK profiles of JNJ-6640 administered as IV (1 mg kg-1), PO (5 mg kg-1 and 50 mg kg-1) or SC (1500 mg kg-1; long-acting injectable [LAI]). n = 3 mice ± SD (IV and PO) or n = 3 mice ± SD (from a total of 6) for LAI PK studies, alternating sampling in 3 mice per time point. (B) PK profiles following one or two doses of 1500 mg kg-1 JNJ-6640 over 4 weeks. n = 3 mice ± SD (from a total of 6) alternating sampling in 3 mice per time point.


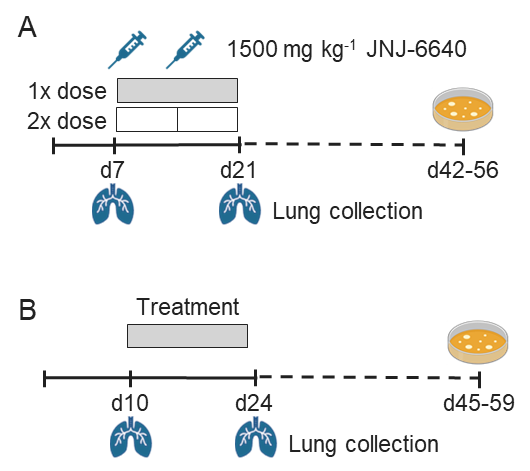


Supplementary Figure S14: Schematic of acute animal studies – Model for the (A) short acute and (B) high acute animal models of infection.

Supplementary Figure S15: Time-kill kinetics *in vitro* providing proof-of-concept for combination treatment with JNJ-6640 *- In vitro* combination studies over 21 days focused on replacing linezolid with JNJ-6640. RMP: 0.1 µM RMP/INH: 14.58 µM rifampicin and 5.8 µM isoniazid. B: 0.5 µM bedaquiline; Pa: 7 µM pretomanid; L: 6 µM linezolid; 6640: 0.1-10 µM JNJ-6640. n = 3 biological replicates ± SD. Representative of two independent experiments shown.


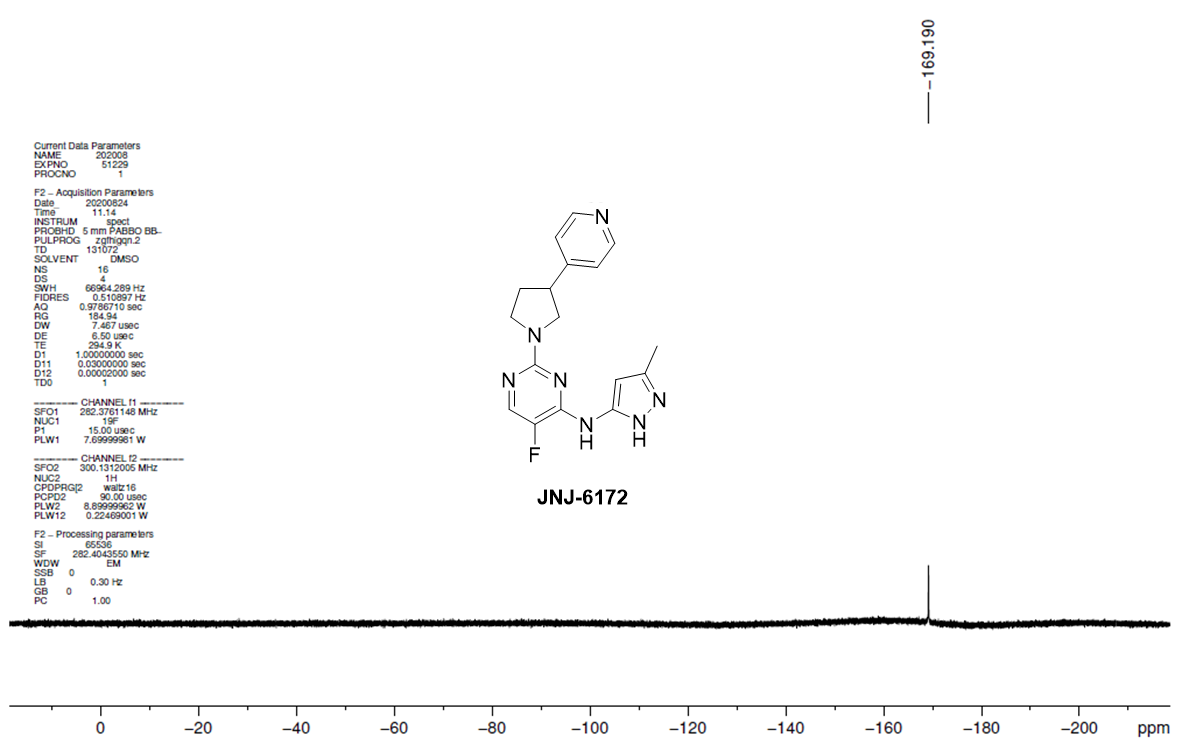


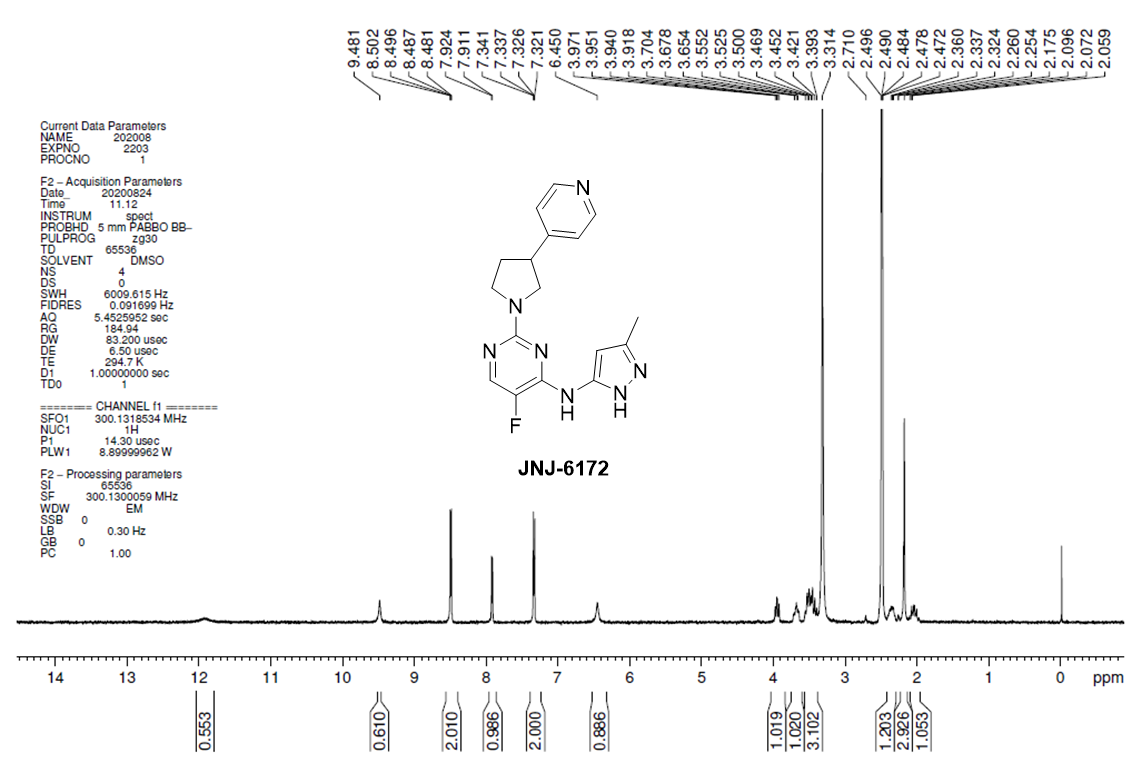


**JNJ-7310**


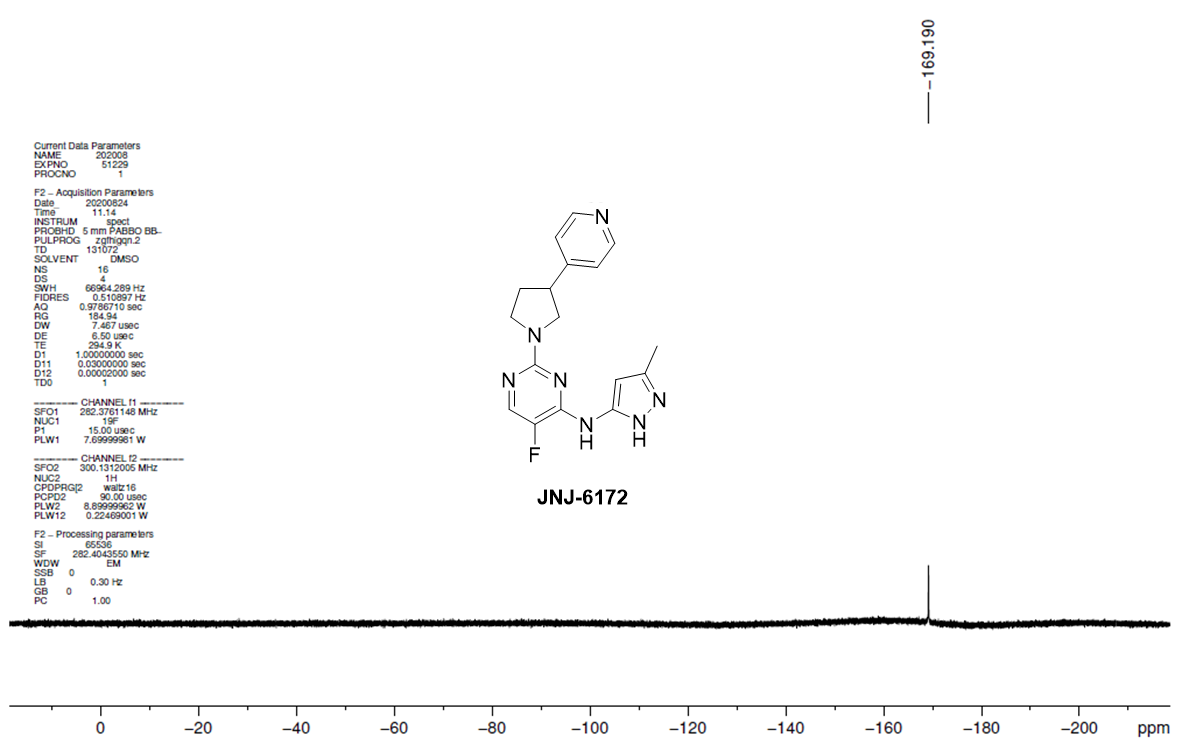


**JNJ-7310**


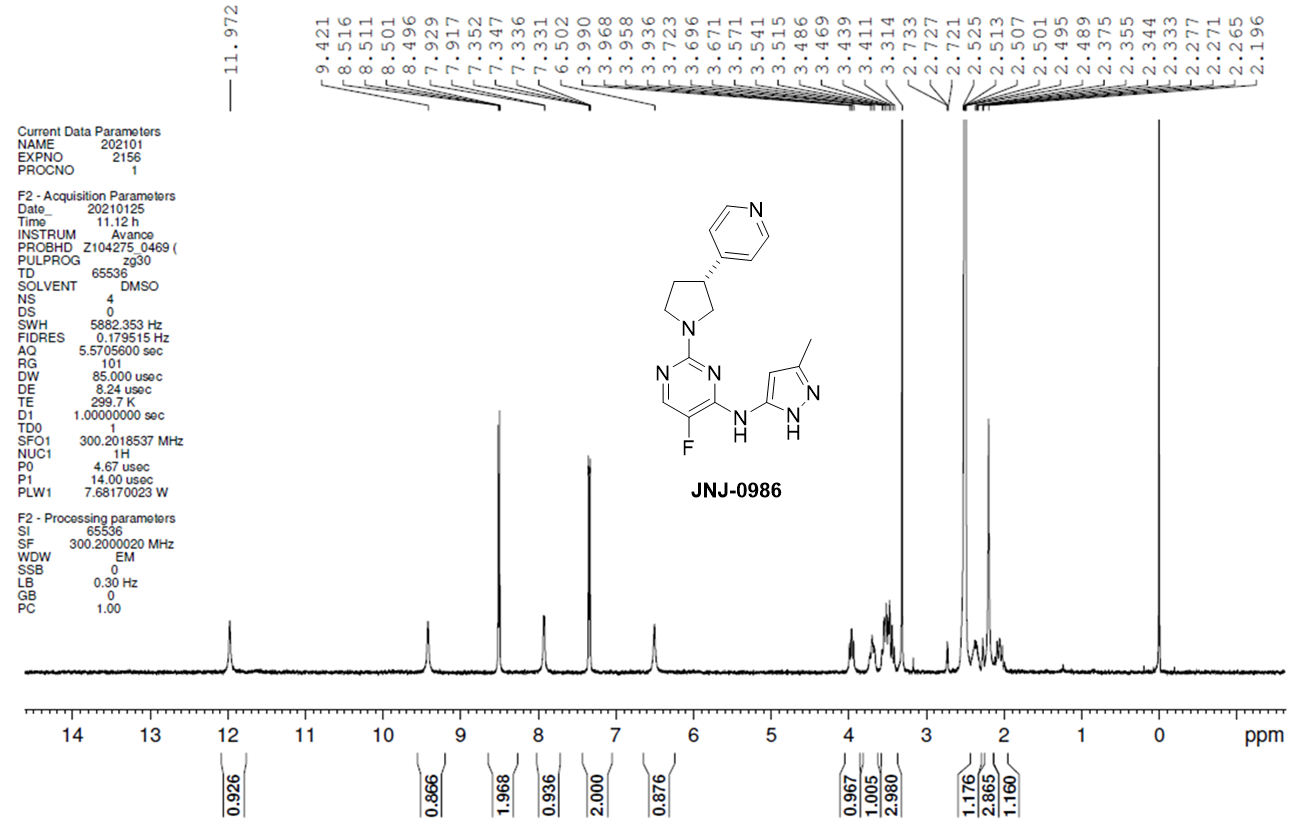


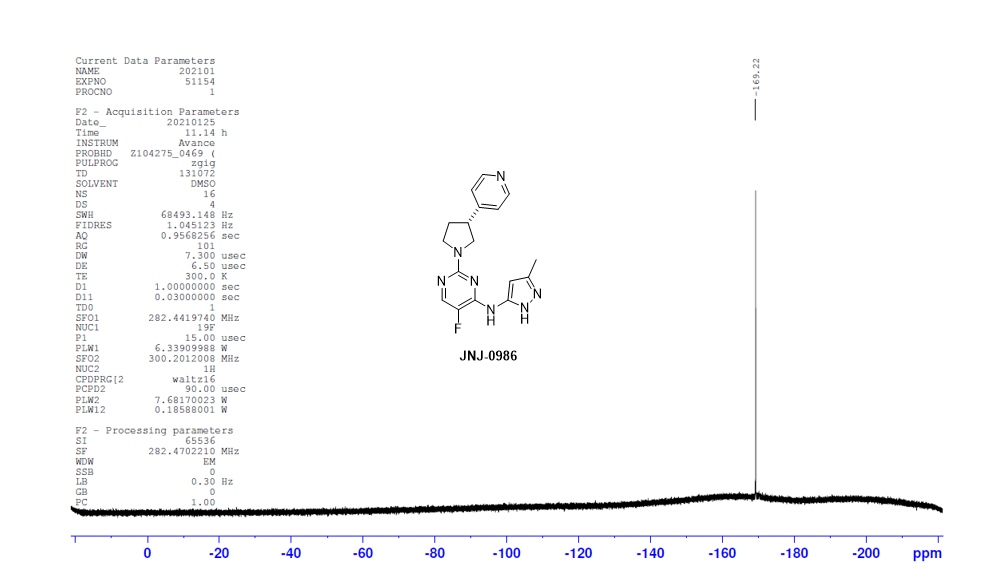


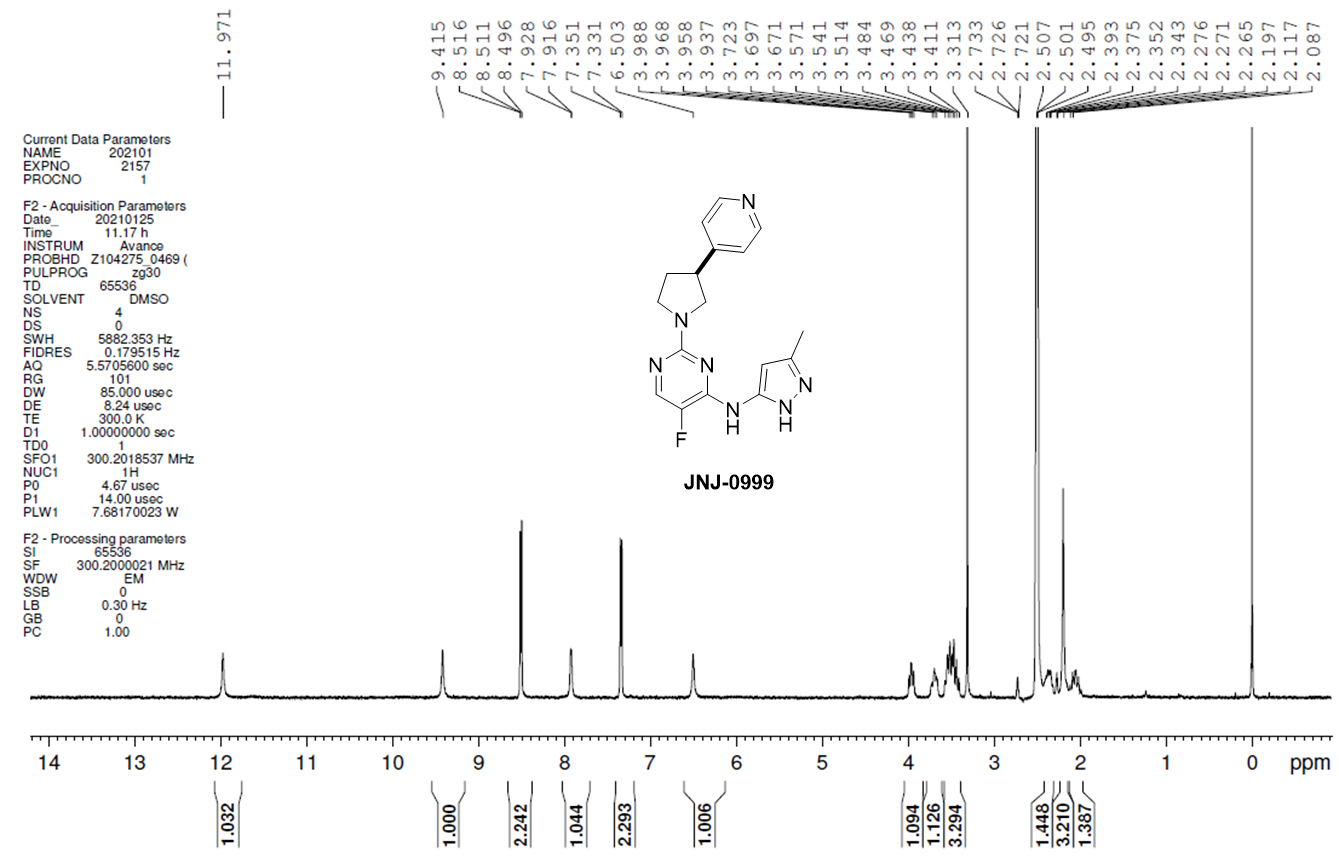


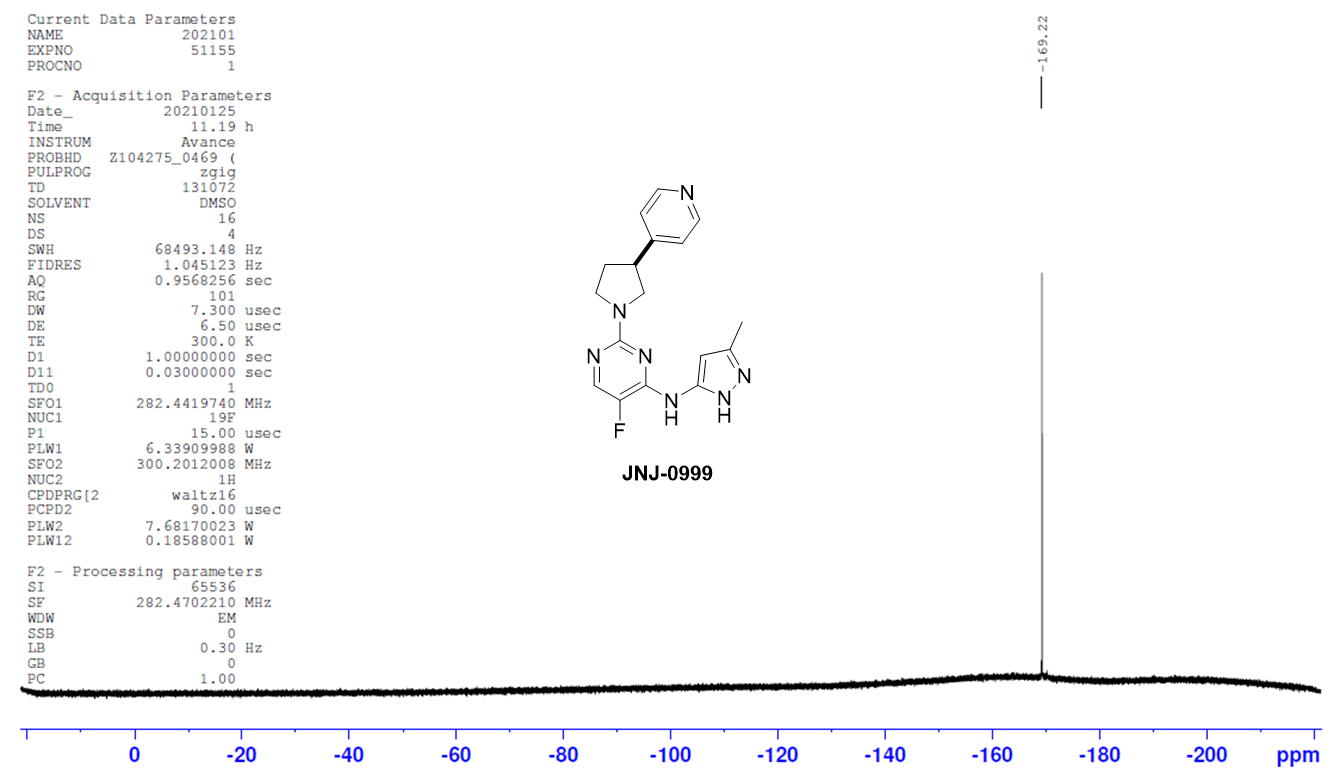


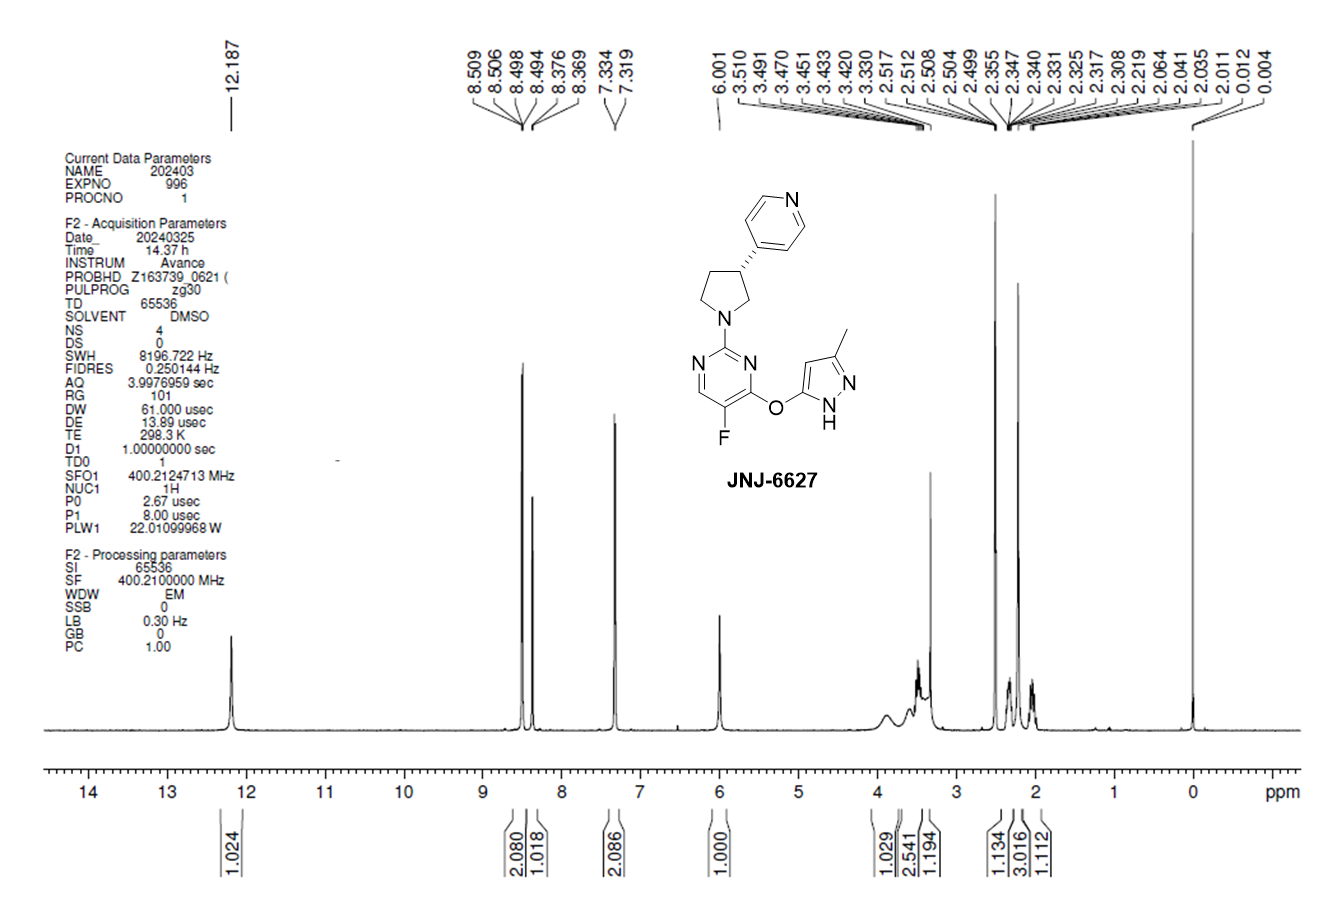


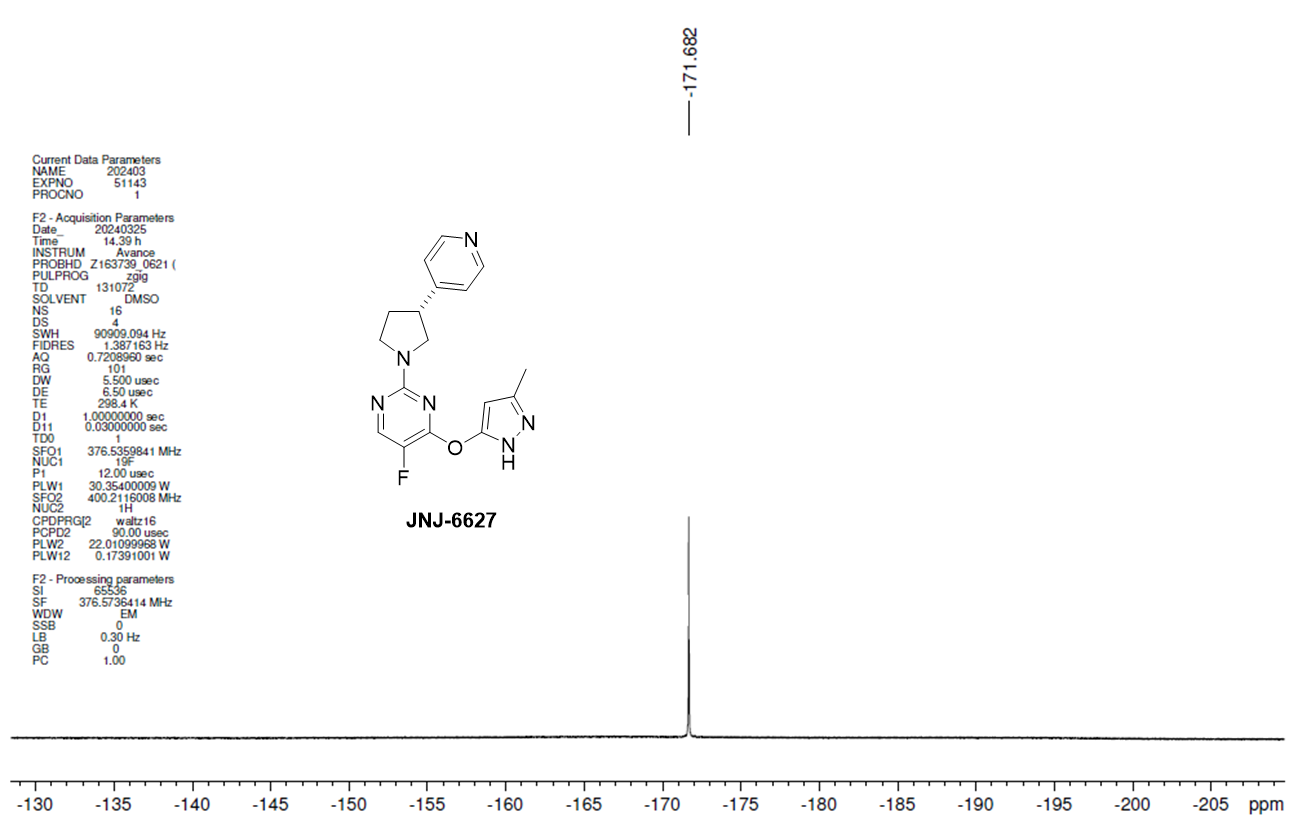


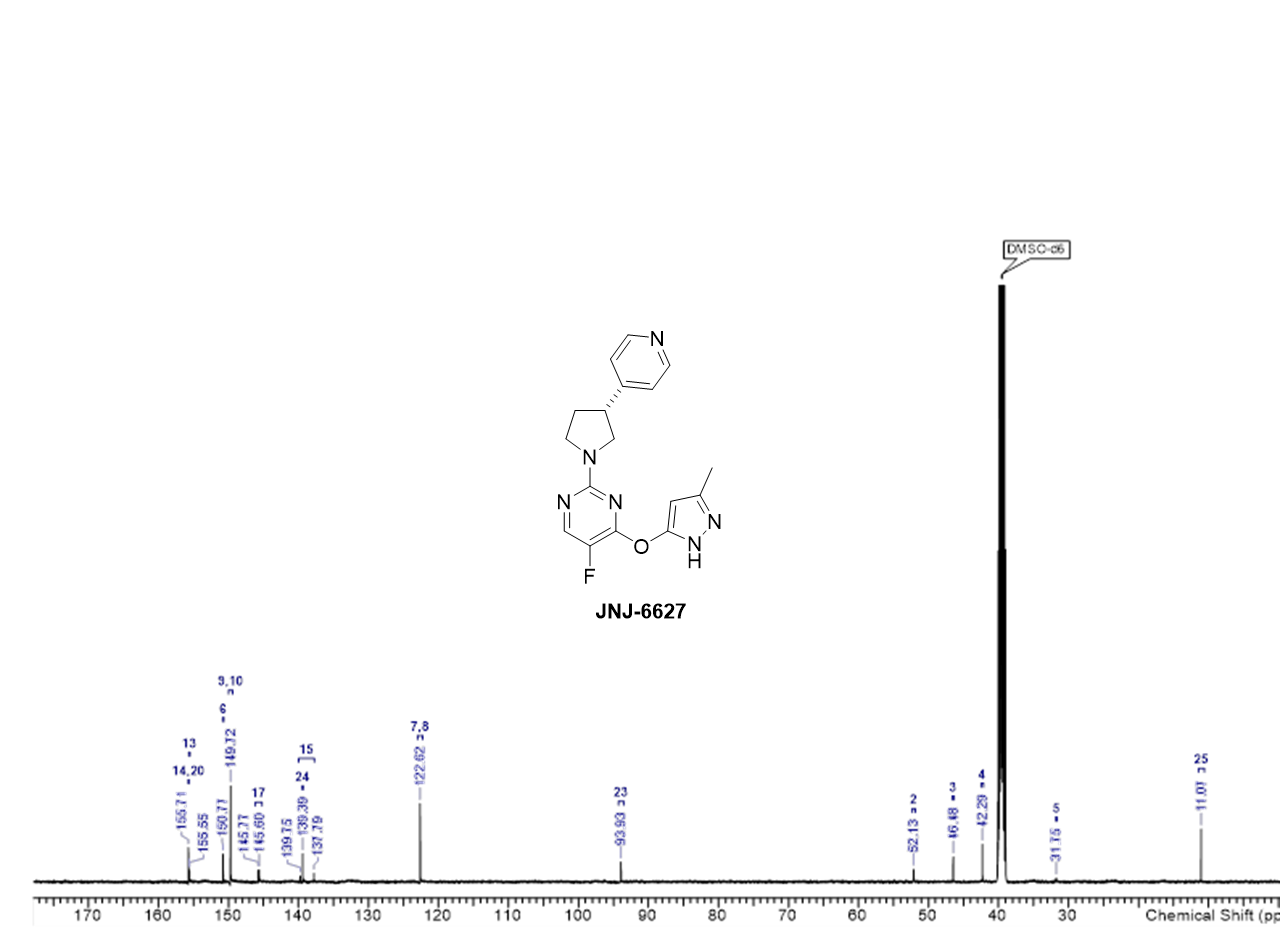


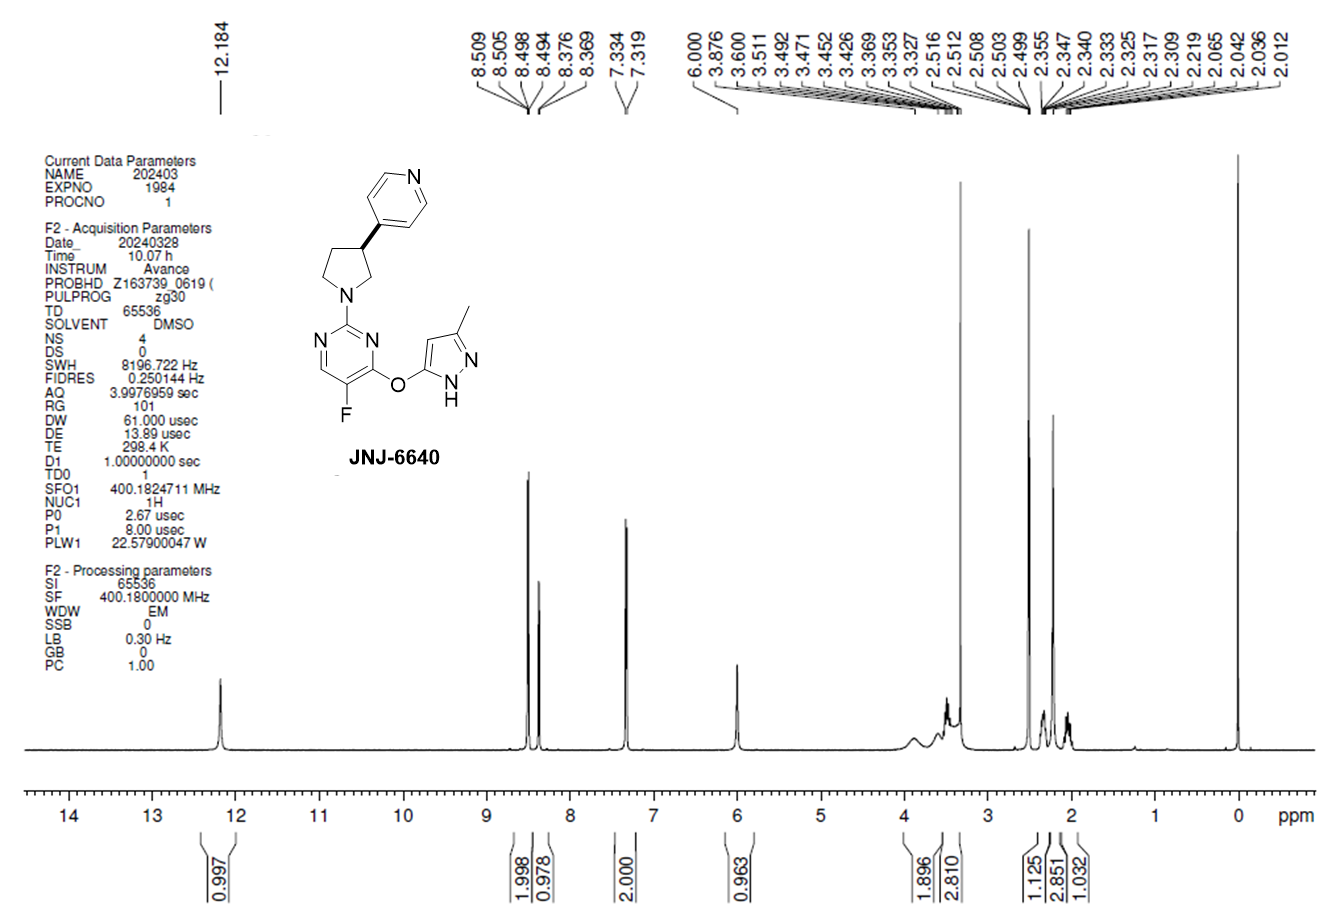

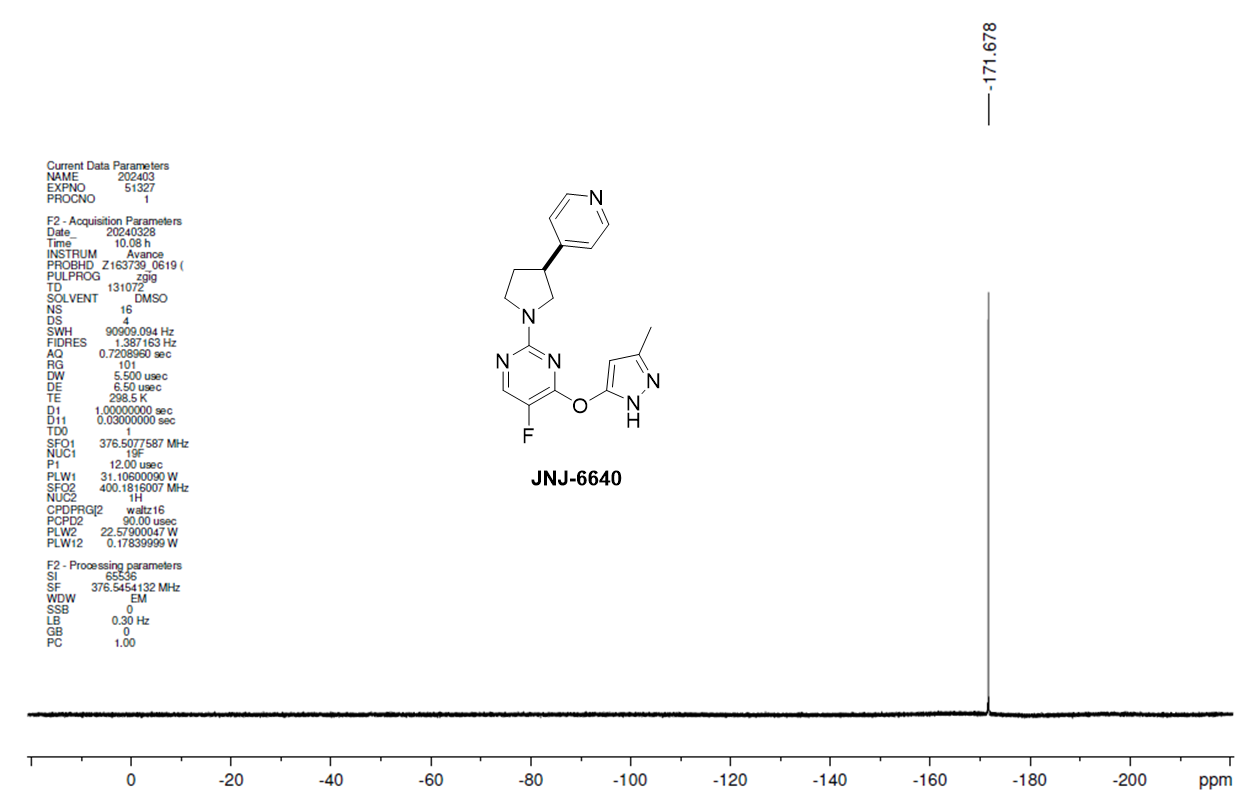


##
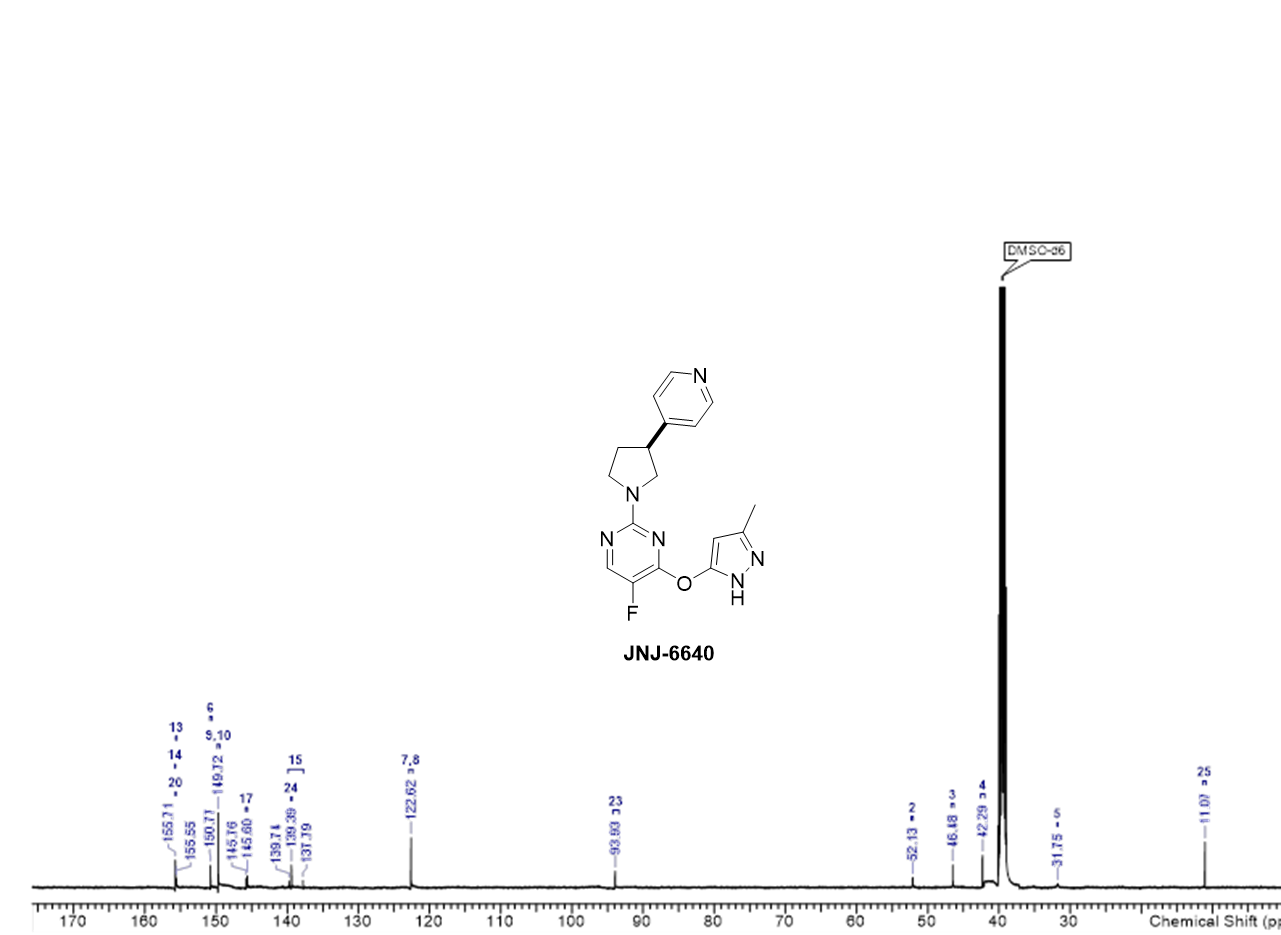


##

## Supplementary Figure S16: NMR 1H, 19F and 13C spectra for JNJ-7310, JNJ-0999, JNJ-0986, JNJ-6627 and JNJ-6640.

# Supplementary Tables

Supplementary Table S1: JNJ-6640 activity under different *in vitro* conditions – MIC90 values in selected media conditions, species and assays. n = ≥2 independent experiments consisting of ≥2 technical replicates ± SD. Erdman MIC90 performed once.

| Condition | JNJ-6640 |
| --- | --- |
| *M. tuberculosis* H37Rv MIC90 | 8.6 ± 3.9 nM |
| *M. tuberculosis* Erdman MIC90 | <20 nM |
| *M. tuberculosis* H37Rv MBC99.9 | 140 ± 63 nM |
| *M. tuberculosis* non-replicative IC50 | 2.8 ± 0.7 µM |
| *M. tuberculosis* cholesterol media MIC90 | 29.1 ± 1.7 nM |
|  |  |
| *M. tuberculosis* Intracellular macrophage IC50 | 26.1 ± 10.1 nM |
|  |  |
| *M. smegmatis* MIC90 | 3.52 ± 0.6 µM |
| *M. marinum* MIC90 | 5.48 ± 0.36 nM |

Supplementary Table S2: JNJ-6640 profiled against drug sensitive and resistant clinical isolates – INH: Isoniazid; RMP: Rifampicin; EMB: Ethambutol; AMK: Amikacin; TAC: Thiacetazone; SM: Streptomycin; OFL: Ofloxacin. S: drug sensitive; R: drug resistant. MIC: Minimum inhibitor concentration.

| Strain | Resistance phenotype | | | | | | | MIC (µM) | Fold change |
| --- | --- | --- | --- | --- | --- | --- | --- | --- | --- |
| INH | RMP | EMB | AMK | TAC | SM | OFL |
|  |  |  |  |  |  |  |  |  |  |
| Mtb H37Rv | S | S | S | S | S | S | S | 0.02 | - |
| Mtb 11291 | S | S | S | S | S | S | S | 0.02 | 1 |
| Mtb 11907 | S | S | S | R | S | S | S | 0.07 | 3 |
| Mtb 11382 | S | S | S | S | R | S | S | 0.02 | 1 |
| Mtb 9268 | R | S | S | S | S | S | S | 0.06 | 3 |
| Mtb 10865 | S | S | S | S | R | S | S | 0.09 | 4 |
| Mtb 11905 | R | S | S | S | S | S | S | 0.02 | 1 |
| Mtb 11178 | R | R | S | S | S | S | S | 0.07 | 3 |
| Mtb 7524 | R | S | S | R | S | S | S | 0.02 | 1 |
| Mtb 11236 | R | S | S | S | R | R | S | 0.06 | 3 |
| Mtb 11138 | R | R | S | S | R | S | S | 0.06 | 3 |
| Mtb 8673 | R | R | S | R | R | S | S | 0.02 | 1 |
| Mtb 10899 | R | R | R | R | S | S | S | 0.02 | 1 |
| Mtb 9394 | R | S | S | R | R | S | R | 0.30 | 13 |
| Mtb 8531 | S | S | S | R | S | S | R | 0.04 | 2 |
| Mtb 11033 | S | R | S | S | R | R | S | 0.06 | 3 |

Supplementary Table S3: Profiling of JNJ-6640, JNJ-6627 and JNJ-7310-resistant strains against clinical compounds – MIC50 values (nM) against other compounds from the series and clinical compounds with fold difference from WT shown in brackets.

| **Strain** | **Mutation** | **JNJ-6640** | **JNJ-6627** | **JNJ-7310** | **BDQ** | **RIF** | **INH** | **EMB** | **LZD** | **MOX** | **CFZ** | **PTD** |
| --- | --- | --- | --- | --- | --- | --- | --- | --- | --- | --- | --- | --- |
| WT |  | 2.66 | 12.7 | 72.4 | 36.2 | 1.18 | 121 | 1720 | 626 | 41.7 | 114 | 69.6 |
| 6640-R1 | I241V | 116 (44) | 526 (41) | 2170 (30) | 45.2 (1) | 1.14 (1) | 130 (1) | 900 (0.5) | 826 (1) | 42.5 (1) | 122 (1) | 134 (2) |
| 6640-R2 | I241V | 108 (41) | 446 (35) | 4260 (59) | 30.8 (1) | 0.91 (1) | 126 (1) | 649 (0.33) | 733 (1) | 42.3 (1) | 72.3 (1) | 84.9 (1) |
| 6640-R3 | I241V | 97.1 (37) | 80 (6) | 1890 (26) | 31.5 (1) | 1.03 (1) | 138 (1) | 655 (0.33) | 794 (1) | 43.5 (1) | 80.5 (1) | 148 (2) |
| 6640-R4 | I241V | 95.2 (36) | 447 (35) | 1960 (27) | 29.4 (1) | 1.17 (1) | 138 (1) | 644 (0.33) | 727 (1) | 43.6 (1) | 76.3 (1) | 102 (1) |
| 6640-R5 | I241V | 90.9 (34) | 81.6 (6) | 1890 (26) | 32.2 (1) | 0.99 (1) | 137 (1) | 604 (0.33) | 742 (1) | 43.3 (1) | 88.1 (1) | 88.3 (1) |
|  |  |  |  |  |  |  |  |  |  |  |  |  |
| WT |  | 4.01 | 16.9 | 80.1 | 11.3 | 1.29 | 83.7 | 1920 | 701 | 13.8 | 25.3 | 67.9 |
| 6627-R1 | F428V | 245 (61) | 3000 (177) | 7600 (95) | 18.7 (2) | 1.8 (1) | 119 (1) | 1370 (1) | 668 (1) | 21.1 (2) | 54.8 (2) | 98.5 (1) |
| 6627-R2 | F428V | 247 (62) | 3300 (195) | 8570 (107) | 18.1 (2) | 2.34 (2) | 126 (2) | 1680 (1) | 687 (1) | 24.1 (2) | 58.8 (2) | 115 (2) |
| 6627-R4 | F428V | 274 (68) | 3679 (217) | 9366 (117) | 20.2 (2) | 2.15 (2) | 125 (1) | 1290 (1) | 673 (1) | 31.7 (2) | 69.3 (3) | 101 (1) |
| 6627-R5 | F428V | 261 (65) | 3300 (195) | 7900 (99) | 21 (2) | 1.90 (1) | 167 (2) | 1350 (1) | 667 (1) | 27.7 (2) | 78.8 (3) | 94.5 (1) |
| 6627-R6 | I241V | 92.5 (23) | 361 (21) | 1627 (20) | 7.12 (1) | 0.90 (1) | 111 (1) | 1210 (1) | 698 (1) | 21.8 (2) | 36.0 (1) | 62.8 (1) |
| 6627-R7 | I241V | 85.5 (21) | 325 (19) | 1440 (18) | 7.69 (1) | 0.83 (1) | 90.3 (1) | 1100 (1) | 699 (1) | 19.9 (1) | 30.3 (1) | 57.6 (1) |
| 6627-R9 | I241V | 169 (42) | 624 (37) | 2690 (34) | 20.1 (2) | 1.14 (1) | 88.6 (1) | 808 (0.5) | 727 (1) | 28.9 (2) | 53.5 (2) | 137 (2) |
| 6627-R10 | I241V | 137 (34) | 508 (30) | 2060 (26) | 21.9 (2) | 1.15 (1) | 128 (2) | 735 (0.5) | 724 (1) | 28.3 (2) | 51 (2) | 93.5 (1) |
|  |  |  |  |  |  |  |  |  |  |  |  |  |
| WT |  | 2.38 | 10.6 | 70 | 24.2 | 1.01 | 19.8 |  |  |  |  |  |
| 7310-R1 | F428C | 93.9 (40) | 3360 (318) | 7630 (109) | 57.5 (2) | 0.92 (1) | 24.5 (1) |  |  |  |  |  |
| 7310-R2 | F428C | 88.7 (37) | 1340 (127) | 7780 (111) | 55.9 (2) | 1.21 (1) | 25.3 (1) |  |  |  |  |  |
| 7310-R3 | F428C | 80.8 (34) | 3460 (327) | 6830 (98) | 96.9 (4) | 1.3 (1) | 25.1 (1) |  |  |  |  |  |
| 7310-R4 | F428C | 81.2 (34) | 2250 (213) | 6620 (95) | 88.6 (4) | 1.12 (1) | 25.9 (1) |  |  |  |  |  |
| 7310-R5 | F428C | 108 (46) | 1360 (129) | 7320 (105) | 66.4 (3) | 1.21 (1) | 25.3 (1) |  |  |  |  |  |
| 7310-R6 | F428C | 91.3 (38) | 1040 (99) | 7870 (113) | 64.2 (3) | 1.15 (1) | 27.1 (1) |  |  |  |  |  |
| 7310-R7 | F428C | 96.3 (41) | 2540 (241) | 8050 (115) | 86 (4) | 1.41 (1) | 20.5 (1) |  |  |  |  |  |
| 7310-R8 | S470F | 32.5 (14) | 409 (39) | 2290 (33) | 63.3 (3) | 1.36 (1) | 15.6 (1) |  |  |  |  |  |
| 7310-R9 | F428C | 99.9 (42) | 2724 (258) | 8290 (118) | 70 (3) | 1.26 (1) | 24.7 (1) |  |  |  |  |  |
| 7310-R10 | S470F | 32.7 (14) | 387 (37) | 2420 (35) | 72.9 (3) | 1.29 (1) | 19.1 (1) |  |  |  |  |  |

Supplementary Table S4: IC50 values from *Mt*PurF and *Hs*PPAT enzymatic assays

| Compound | *M. tuberculosis* PurF (µM) | *H. sapiens* PPAT (µM) | Fold Selectivity |
| --- | --- | --- | --- |
|  |  |  |  |
| JNJ-6640 | 0.0013 | >14 | >10,000 |
| JNJ-6627 | 0.0018 | >20 | >11,000 |
|  |  |  |  |

Supplementary Table S5: Cell proliferation assay data – Measurement of JNJ-6640 activity against a range of 93 cancer cell lines compared with known inhibitors of cell proliferation. pIC50 values shown for each cell line. MMPR: 6-methyl-mercaptopurine riboside; MPA: mycophenolic acid. Related to **Figure 2I**.

| **Tissue** | **Cell line** | **JNJ-6640** | **Azathioprine** | **MPA** | **MMPR** |
| --- | --- | --- | --- | --- | --- |
|  |  |  |  |  |  |
| **Bladder** | **5637** | 4.08 | 5.82 | 6.69 | 7.08 |
|  | **CLS439** | 4.19 | 4.49 | 6.33 | 5.82 |
|  | **EJ28** | <4 | 4.94 | 6.19 | 5.94 |
|  | **J82** | 4.02 | 4.38 | 5.47 | 5.17 |
|  | **T24** | <4 | 4.23 | 6.00 | 4.82 |
|  | **UMUC3** | 4.64 | 5.03 | 6.34 | 6.46 |
|  |  |  |  |  |  |
| **Blood** | **GRANTA-519** | <4 | 4.14 | 6.69 | <4 |
|  | **HL-60** | 4.50 | 5.07 | 6.59 | 6.57 |
|  | **K-562** | 4.69 | 5.77 | 6.69 | 7.41 |
|  | **KASUMI-1** | 4.81 | 5.29 | 5.74 | 7.64 |
|  | **L-363** | 4.68 | 4.86 | 6.39 | 7.78 |
|  | **MINO** | 4.61 | 5.59 | 6.64 | 7.57 |
|  | **MV4-11** | 5.33 | 6.55 | 6.48 | >8 |
|  | **RAMOS** | 4.39 | 5.75 | 7.38 | 7.25 |
|  | **SU-DHL-6** | 4.57 | 5.49 | 6.18 | 7.89 |
|  | **SU-DHL-10** | 4.07 | 4.16 | 5.40 | 4.17 |
|  | **THP-1** | 4.17 | 5.77 | 6.36 | 7.28 |
|  | **WSU-NHL** | 4.67 | 5.83 | 7.13 | 7.52 |
|  |  |  |  |  |  |
| **Bone** | **MG63** | <4 | 4.28 | 5.92 | 5.92 |
|  | **MHHES1** | 4.11 | 5.75 | 6.84 | 7.27 |
|  | **RDES** | 4.00 | 4.22 | 6.28 | 6.67 |
|  | **SAOS2** | 4.02 | <4 | 5.49 | 6.19 |
|  | **U2OS** | <4 | 4.35 | 6.14 | 5.89 |
|  |  |  |  |  |  |
| **Brain** | **SKNSH** | <4 | 4.46 | 6.21 | 5.27 |
|  | **SF268** | <4 | <4 | 6.24 | 4.09 |
|  | **SF295** | 4.11 | 5.05 | 6.28 | 5.87 |
|  | **SKNAS** | <4 | 4.02 | 5.49 | 5.43 |
|  | **SNB75** | <4 | <4 | 5.78 | 4.55 |
|  | **U87MG** | <4 | <4 | 5.87 | 4.51 |
|  |  |  |  |  |  |
| **Breast** | **BT20** | 4.25 | 3.99 | 5.53 | 5.55 |
|  | **HS578T** | <4 | 4.14 | 5.60 | 4.70 |
|  | **JIMT1** | 4.05 | 4.53 | 5.94 | 5.90 |
|  | **MCF7** | 4.49 | 5.25 | 6.13 | 7.21 |
|  | **MDAMB231** | <4 | <4 | 5.92 | 4.89 |
|  | **MDAMB436** | 4.34 | 5.19 | 5.95 | 5.77 |
|  | **MDAMB468** | 4.49 | 5.61 | 6.38 | 6.41 |
|  | **MT3** | 4.25 | 4.93 | 6.07 | 6.05 |
|  | **SKBR3** | 4.22 | 4.93 | 5.81 | 7.45 |
|  |  |  |  |  |  |
| **Cervix** | **C33A** | 4.57 | 4.39 | 5.98 | 6.65 |
|  | **CASKI1** | 4.13 | 4.14 | 5.67 | 6.60 |
|  | **HELA** | <4 | <4 | 5.85 | 4.98 |
|  |  |  |  |  |  |
| **Colon** | **CACO2** | 4.31 | 4.42 | 5.98 | 6.23 |
|  | **COLO205** | 4.18 | 5.08 | 6.54 | 6.75 |
|  | **COLO678** | 4.11 | <4 | 5.57 | 5.08 |
|  | **DLD1** | 4.50 | 5.28 | 6.39 | 6.83 |
|  | **HCT116** | 4.32 | 5.18 | 6.25 | 7.23 |
|  | **HCT15** | 4.38 | 4.89 | 6.70 | 6.68 |
|  | **HT29** | 4.52 | 5.21 | 5.91 | 6.67 |
|  | **LOVO** | 4.59 | 5.38 | 6.31 | 6.45 |
|  | **SW620** | 4.28 | 5.16 | 6.46 | 6.18 |
|  |  |  |  |  |  |
| **Connective Tissue** | **HT108** | 4.28 | 5.36 | 6.48 | 6.95 |
|  |  |  |  |  |  |
| **Kidney** | **786O** | 4.26 | 5.37 | 6.19 | 6.30 |
|  | **ACHN** | 4.39 | 4.39 | 5.97 | 6.24 |
|  | **CAKI1** | 4.55 | 5.77 | 6.01 | 7.44 |
|  | **HEK293** | 4.06 | 4.54 | 6.46 | 5.14 |
|  | **UO31** | 4.38 | 5.08 | 5.71 | 6.47 |
|  |  |  |  |  |  |
| **Liver** | **HEPG2** | 4.37 | 4.82 | 6.29 | 7.39 |
|  | **PLCPRF5** | 4.45 | <4 | 5.93 | 5.95 |
|  | **SKHEP1** | 4.22 | 5.29 | 6.52 | 6.63 |
|  |  |  |  |  |  |
| **Lung** | **A549** | 4.39 | 4.39 | 6.25 | 6.98 |
|  | **CALU6** | 4.03 | 4.54 | 5.98 | <4 |
|  | **IMR90** | <4 | <4 | 6.07 | 5.29 |
|  | **NCIH82** | 4.13 | 5.18 | 6.12 | 6.15 |
|  | **NCIH292** | 4.32 | 4.95 | 6.74 | 7.01 |
|  | **NCIH358M** | 4.31 | 4.73 | 5.72 | 6.23 |
|  | **NCIH460** | 4.43 | 5.15 | 6.54 | 7.15 |
|  |  |  |  |  |  |
| **Muscle** | **A204** | 4.44 | 4.89 | 5.76 | 7.06 |
|  | **A673** | <4 | 4.91 | 6.23 | 6.38 |
|  | **HS729** | <4 | <4 | 5.52 | <4 |
|  | **RD** | 4.11 | <4 | 5.39 | 6.38 |
|  | **TE671** | 4.37 | 4.03 | 6.14 | 5.77 |
|  |  |  |  |  |  |
| **Ovarian** | **A2780** | 4.79 | 5.45 | 7.19 | 7.73 |
|  | **IGROV1** | 4.34 | 4.77 | 6.25 | 6.75 |
|  | **EFO21** | 4.12 | 4.76 | 5.93 | 6.61 |
|  | **OVCAR3** | 4.34 | 5.22 | 6.39 | 6.86 |
|  | **OVCAR4** | 4.28 | 5.64 | 6.01 | 7.29 |
|  | **SKOV3** | <4 | 4.76 | 6.10 | 4.72 |
|  |  |  |  |  |  |
| **Pancreas** | **ASPC1** | 4.36 | 4.72 | 5.65 | 6.37 |
|  | **BXPC3** | 4.23 | 5.66 | 5.53 | 6.57 |
|  | **MIAPACA2** | 4.43 | 4.70 | 6.20 | 7.48 |
|  | **PANC1** | 4.10 | 4.51 | 5.58 | 5.84 |
|  | **PANC1005** | 4.27 | 4.14 | 6.14 | 5.67 |
|  |  |  |  |  |  |
| **Placenta** | **JAR** | 4.48 | 4.49 | 6.45 | 5.16 |
|  | **JEG3** | 4.54 | 5.09 | 6.79 | 6.74 |
|  |  |  |  |  |  |
| **Prostate** | **22RV1** | 4.02 | 5.37 | 5.97 | 6.24 |
|  | **DU145** | 4.33 | 4.40 | 6.20 | 6.44 |
|  | **PC3** | 4.02 | 4.38 | 5.82 | 6.45 |
|  |  |  |  |  |  |
| **Skin** | **A375** | 4.21 | 4.98 | 6.03 | 5.96 |
|  | **MDAMB435** | 4.35 | 5.01 | 6.50 | 7.34 |
|  | **SKMEL28** | <4 | 4.72 | 6.16 | 5.32 |
|  | **SKMEL5** | 4.19 | 4.66 | 6.07 | 5.55 |
|  |  |  |  |  |  |
| **Squamous** | **A431** | 4.21 | 5.59 | 6.55 | 7.24 |
|  |  |  |  |  |  |
| **Uterus** | **SKLMS1** | 4.08 | 5.33 | 6.15 | 6.59 |
|  |  |  |  |  |  |
| **Control** | **PBMC** | <4 | <4 | <5 | <4 |
|  |  |  |  |  |  |

Supplementary Table S6: Nucleobase concentrations in uninfected mouse lung tissue – n = 5 replicates ± SD. ND: Not determined.

| **Nucleobase** | **Total uninfected mouse lung (ng g-1)** | **Final concentration used *in vitro* assays** |
| --- | --- | --- |
|  |  |  |
| Guanine | ND | 518 nM |
| Hypoxanthine | 639 ± 59 | 5.2 µM |
| Adenine | 367 ± 99 | 4.3 µM |
| Xanthine | 440 ± 47 | - |
| Guanosine | 413 ± 55 | 1.42 µM |
| Inosine | 3180 ± 361 | 15 µM |
| Adenosine | 6100 ± 310 | 23 µM |
|  |  |  |

Supplementary Table S7: Foamy macrophage IC50 ratios to determine bactericidality in hypoxic conditions – IC50 values were determined based on measurement of bacterial bioluminescence before (day 4; D4) and after (day 4 +1; D4+1) regrowth in normoxic conditions. IC50 ratios of >2 classed as bactericidal. n = 2 individual experiments with 4 technical replicates ± SD.

|  |  | **IC50**  **(µM)** | **IC50 ratio**  **(D4/D4+1)** |
| --- | --- | --- | --- |
| JNJ-6640 | Day 4 | 30.00 | 45.3 |
| Day 4 + 1 | 0.66 |
| Delamanid | Day 4 | 0.01 | 0.35 |
| Day 4 + 1 | 0.04 |
| Isoniazid | Day 4 | 0.67 | 0.65 |
| Day 4 + 1 | 1.03 |
| Linezolid | Day 4 | 23.25 | 1.17 |
| Day 4 + 1 | 19.91 |
| Pretomanid | Day 4 | 0.11 | 0.05 |
| Day 4 + 1 | 2.29 |
| Rifampicin | Day 4 | 2.46 | 96 |
| Day 4 + 1 | 0.03 |
| Bedaquiline | Day 4 | 0.18 | 3.0 |
| Day 4 + 1 | 0.06 |

Supplementary Table S8: ADME and toxicology profile for JNJ-6640 – m: mouse; h: human; r: rat. ACA: cytotoxicity; Glu/Gal: mitotoxicity; AMES: genotoxicity; hERG: cardiotoxicity; Papp (A-B): permeability; LM Clint: liver microsome intrinsic clearance; Hep Clint: hepatocyte intrinsic clearance; CYP IC50: inhibition of cytochrome p450 enzymes.

| **Parameter** | **JNJ-6640** |
| --- | --- |
|  |  |
| **Glu/Gal** (µM) | >100/>100 |
| **ACA** (HepG2 in µM) | 28 |
| **AMES II** | negative |
| **hERG** (hts) (pIC50) | 4.97 |
| **Papp (A→B) (+ inh)** x10-6 cm s-1 | 8.1 (39.2) |
| **Protein binding**, % free (m/r/h) | 4.4/3.9/0.5 |
| **LM Clint** in µL min-1 mg protein-1 (m/r/h) | 138/82/33 |
| **Hep Clint** inµL min-1 106 cells-1 (m/h) | 52/110 |
| **CYP IC50** in µM (3A4/2D6/1A2/2C19) | 0.69/1.2/<0.25/<0.25 |

Supplementary Table S9: Pharmacokinetic profiling of JNJ-6640 - Results are expressed as the mean ± SD. n = 3 animals were dosed for the IV and PO arms and n = 3 animals by alternating sampling (from a total of 6 dosed) for SC arms (LAI), alternating sampling per time point was performed to limit the number of times blood was collected per animal, therefore we were unable to calculate error for these treatments. CL: clearance; Cmax = maximum concentration reached; t1/2: half-life; AUC: area under the curve; MRT: Mean residence time; F: bioavailability; Vss: volume of distribution; Vz: terminal elimination phase.

| Parameter | JNJ-6640 | | | | |
| --- | --- | --- | --- | --- | --- |
|  |  |  |  |  |  |
| **Route** | **IV** | **PO** | **PO** | **SC** | **SC** |
| Dose (mg kg-1) | 1 | 5 | 50 | 1x 1500 | 2x 1500 |
| CL (mL min-1 kg-1) | 64.7 ± 2.6 | - | - | - | - |
| Cmax (ng mL-1) | - | 1063 ± 320 | 26100 ± 6223 | 12800 | 41800 |
| t1/2 (h) | 0.16 ± 0.05 | 0.76 ± 0.28 | 0.58 ± 0.07 | 286 | 134 |
| Tmax (h) | - | 0.5 | 0.5 | 4 | 292 |
| AUClast (ng h mL-1) | 257 ± 10 | 957 ± 361 | 47575 ± 10400 | 613000 | 1500000 |
| AUCinf (ng h mL-1) | 258 ± 10 | 959 ± 361 | 47608 ± 10400 | 723000 | 1590000 |
| F (%) | - | 74 ± 28 | >100 | >100 | >100 |
| Vss (L kg-1) | 0.75 ± 0.04 | - | - | - | - |
| Vz (L kg-1) | 0.90 ± 0.30 | - | - | - | - |
| MRT (h) | 0.19 ± 0.01 | - | - | - | - |
|  |  |  |  |  |  |

Supplementary Table S10: Oligos used in this study - Shown in the 5’ to 3’ direction.

| Oligo Name | Oligo Sequence |
| --- | --- |
|  |  |
| sigA forward qPCR | [GACGAAGACCACGAAGACC](https://protect-eu.mimecast.com/s/tOb4CKQDxUxrQZ3HpwDeq?domain=thermofisher.com) |
| sigA reverse qPCR | [CATCCCAGACGAAATCACC](https://protect-eu.mimecast.com/s/tOb4CKQDxUxrQZ3HpwDeq?domain=thermofisher.com) |
| purF forward qPCR | GGAGCGTTCTGTCTGACGTT |
| purF reverse qPCR | ATATCACGGACGAACGAGGC |
| purF-50% forward sgRNA | GGGAGACCAGGCCGAGGTCTTTGAAGA |
| purF-50% reverse sgRNA | AAACTCTTCAAAGACCTCGGCCTGGTC |
| purF-69% forward sgRNA | GGGAGGGCCAGCAGCGCCC |
| purF-69% reverse sgRNA | AAACGGGCGCTGCTGGCCC |
| purF-91% forward sgRNA | GGGAGTGTTTTCGTCCATGAACGTCAG |
| purF-91% reverse sgRNA | AAACCTGACGTTCATGGACGAAAACAC |
| TGS1_F | GCTACAGCGCAGCAAAGG |
| TGS1_R | GGCAAGCGCAACATCATTGAT |
| TGS1_M (FAM) | CCGGCACACCTGTTCG |
| HSPX_F | GTCCGCGATGGTCAGCT |
| HSPX_R | CGAAGGAACCGTACGCGAAT |
| HSPX_M (FAM) | GTCGAAGTCCTTC |
| MTB-RPOA_F | GTGCTCAAAGTGACCTACAAGGT |
| MTB-RPOA_R | ACGTCCAGGATCAGCTTGTC |
| MTB-RPOA_M (FAM) | CAGCGCACCGACTTC |
| RV3290C_F | CGCGCGGCATTCGA |
| RV3290C_R | GGGTTCGGCCACAAAACAC |
| RV3290C_M (FAM) | CCGCCCGCACGACAT |
| 16S-RSS_F | GGGTCTCTGGGCAGTAACTG |
| 16S-RSS_R | GTGGACTACCAGGGTATCTAATCCT |
| 16S-RSS_M (FAM) | TCGCTCCCCACGCTTT |
|  |  |
